# Supplementary material for: Modeling study of impacts on surface ozone of regional transport and emission reductions over North China Plain in summer 2015
Source: Copernicus journal article supplement (doi:10.5194/acp-2018-209), 2018-05-04
Supplement: Supplementary file [file acp-2018-209-AC1-supplement.pdf]

1 **Modeling study of impacts on surface ozone of regional transport and**  
2 **emission reductions over North China Plain in summer 2015**

3 Xiao Han<sup>1,2</sup>, Lingyun Zhu<sup>3</sup>, Shulan Wang<sup>4</sup>, Xiaoyan Meng<sup>5</sup>, Meigen Zhang<sup>1,2</sup>, Jun Hu<sup>4</sup>

4 <sup>1</sup> *State Key Laboratory of Atmospheric Boundary Layer Physics and Atmospheric Chemistry, Institute of*  
5 *Atmospheric Physics, Chinese Academy of Sciences, Beijing 100029, China.*

6 <sup>2</sup> *College of Earth Science, University of Chinese Academy of Sciences, Beijing 100049, China*

7 <sup>3</sup> *Shanxi Province Institute of Meteorological Sciences, Taiyuan 030002, China*

8 <sup>4</sup> *Chinese Research Academy of Environmental Sciences, Beijing, 100012, China*

9 <sup>5</sup> *China National Environmental Monitoring Centre, Beijing, 100012, China*

10  
11 Corresponding author:

12 Meigen Zhang

13 LAPC, Institute of Atmospheric Physics, Chinese Academy of Sciences

14 HuaYanBeiLi 40#, Chaoyang District

15 Beijing, China

16 Post code: 100029

17 Tel: 86-010-62379620

18 Fax: 86-010-62041393

19 E-mail: mgzhang@mail.iap.ac.cn

20 Lingyun Zhu

21 E-mail: mgzhang@mail.iap.ac.cn

22  
23 Other authors:

24 Xiao Han, E-mail: hanxiao@mail.iap.ac.cn

25 Shulan Wang, E-mail: shulanwang@foxmail.com

26 Xiaoyan Meng, E-mail: mengxy@cnemc.cn

27 Jun Hu, E-mail: hujun@craes.org.cn

32        **Abstract**

33        Tropospheric ozone (O<sub>3</sub>) has replaced PM<sub>2.5</sub> or PM<sub>10</sub> as the premier pollution in the North China Plain  
34 (NCP) during summer in recent years. A comprehensive understanding of the O<sub>3</sub> production in responding  
35 to the reduction of precursor emission over NCP is demanded urgently for the effective control policy  
36 design. In this study, the air quality modeling system RAMS-CMAQ (regional atmospheric modeling  
37 system-community multiscale air quality), coupled with the ISAM (integrated source apportionment  
38 method) module is applied to investigate the O<sub>3</sub> regional transport and source contribution features during  
39 a heavy O<sub>3</sub> pollution episode in June 2015 over NCP. The results show that the emission sources in  
40 Shandong and Hebei were the major contributors to O<sub>3</sub> production in the NCP. Not only the highest local  
41 contribution of O<sub>3</sub> mass burden, but also more than 30% contribution of O<sub>3</sub> mass burdens in Beijing and  
42 Tianjin were provided by the emission sources in these two provinces, respectively. On the other hand, the  
43 urban areas and most O<sub>3</sub> pollution regions of NCP were mainly dominated by the VOC-sensitive conditions,  
44 while "both control" and NO<sub>x</sub>-sensitive conditions dominated the suburban and remote areas, respectively.  
45 Then, based on the sensitivity tests, the effects of several hypothetical scenarios of emission control on  
46 reducing the O<sub>3</sub> pollution were compared and discussed. The results indicated that the emission control of  
47 industry and residential sectors was the most efficient way if the emission reduction percentage was higher  
48 than 40%. However, when the emission reduction percentage dropped below 30%, the power plant sector  
49 could make significant contributions to the decrease in O<sub>3</sub>. The control strategies should be promptly  
50 adjusted based on the emission reduction, and the modeling system can provide valuable information for  
51 precisely choosing the emission sector combination to achieve better efficiency.

## 1. Introduction

In addition to the downward injection of stratospheric ozone ( $O_3$ ), tropospheric  $O_3$  is formed via a suite of photochemical reactions involving nitrogen oxides ( $NO_x$ ), volatile organic compounds (VOCs), and sunlight.  $O_3$  plays an important role in controlling the chemical composition and climate of the troposphere and harms vegetation and human health, especially in industrialized regions (Kleinman et al., 2002). In recent years, the emission of  $O_3$  precursors,  $NO_x$  and VOCs, have increased substantially due to the economic growth, rapid population expansion, and urbanization in the North China Plain (NCP). During the summer,  $PM_{2.5}$  or  $PM_{10}$  are replaced by  $O_3$  as the premier pollution type in major urban areas (China Environmental Status Bulletin 2015).

Numerous studies have investigated the spatial and temporal distribution characteristics of  $O_3$  in the NCP. Lin et al. (2008) analyzed the three-year observation data of the  $O_3$  mixing ratio at a remote Global Atmosphere Watch site near Beijing and showed the seasonal variation features of the  $O_3$  background value for the NCP. Tang et al. (2012) gathered two-year observation data of the  $O_3$  mixing ratio for 22 sites (located in urban, rural, and coastal areas) during a field campaign in the NCP and coupled the data with the meteorological parameters from the WRF. The spatial and temporal variations of  $O_3$  were through analyzed, and the  $O_3$ - $NO_x$ -VOCs sensitivity was initially investigated in this study. Ran et al. (2012) and Dufour et al. (2010) compared the  $O_3$  seasonal variation features in megacities between the NCP and southern China. On the other hand, several studies have applied the chemistry transport model system to reproduce the three-dimensional  $O_3$  continuous distribution characteristic and discussed the sensitivity of  $O_3$  to precursor emissions (Wang et al., 2012; Nie et al., 2014).

Because of the strong emission of air pollutants, widespread haze clouds caused by serious air pollution have occurred frequently over the NCP (Tao et al., 2012; Wang et al., 2013; Li et al., 2016; Zhou et al., 2017). Aiming to solve this problem, the government has executed strict emission control strategies in recent years (Gao et al., 2016), which have yielded an initial effect. As reported by the China Environmental Status Bulletin, the mass loadings of sulfur dioxide ( $SO_2$ ),  $NO_2$ ,  $PM_{2.5}$ , and  $PM_{10}$  steadily fell from 2013 to 2015. However,  $O_3$  has become the only pollutant whose mass burden has continued to increase in the 74 experimental cities of China, and the mass concentration is expected to continue increasing (Deng et al., 2011). Therefore, there is an urgent need to prevent environmental and health hazards in the NCP resulting from the surface  $O_3$ .

As a secondary pollutant, although the basic features of surface  $O_3$  in the NCP are well known from

92 measurement or modeling studies, understanding the chemical links between O<sub>3</sub> and its two main precursors,  
93 NO<sub>x</sub> and VOC, is important for designing effective pollution reduction strategies (Castell et al., 2009). The  
94 chemical transport model is an indispensable method for resolving the above issue, as it can quantify the  
95 main physical and chemical mechanisms of pollutant formation and transport. Liu et al. (2010) used two  
96 process analysis modules (integrated process rates and integrated reaction rates) embedded in CMAQ to  
97 capture the dynamical and photochemical processes of O<sub>3</sub> formation in 2008 over China. As a result, the  
98 influence and contribution of each important process can be distinguished and quantified. Tang et al. (2017)  
99 also used the integrated process rates module for measurement data from a set of observation stations to  
100 evaluate the sensitivity of O<sub>3</sub> production in June 2008 over the NCP. Xing et al. (2010) developed a  
101 statistical response surface method **which aimed at investigating ozone sensitivities to NO<sub>x</sub> and VOC**  
102 **emission changes** and coupled it with CMAQ to analyze O<sub>3</sub> sensitivities to NO<sub>x</sub> and VOCs emission  
103 changes in 2005 over eastern China. The overall impacts from individual sources, including regional NO<sub>x</sub>  
104 and VOCs emission sources, have been evaluated using this modeling system. Li et al. (2008) applied a  
105 tagged tracer method to the framework of NAQPMS to identify the transport contributions from various O<sub>3</sub>  
106 production regions to total O<sub>3</sub> levels in 2008 over central eastern China. This method can be used to  
107 eliminate the errors caused by nonlinearities in the transport and fast photochemistry of O<sub>3</sub> and its  
108 precursors.

109 In general, the substantial features of O<sub>3</sub> formation sensitivity and the contributions of regional-scale  
110 transport have been discussed in these studies. However, more work needs to be done to achieve a  
111 comprehensive understanding of O<sub>3</sub> behavior over the NCP, especially the source contribution approaches  
112 of recent years. In this study, an air quality modeling system called RAMS-CMAQ (regional atmospheric  
113 modeling system–community multiscale air quality) that is coupled with the ISAM (integrated source  
114 apportionment method) module is applied to estimate the regional contributions of O<sub>3</sub> among major regions  
115 of the NCP and to quantify the relative amount of O<sub>3</sub> originating from specific VOCs and NO<sub>x</sub> emissions  
116 sources. A unique method that can distinguish the O<sub>3</sub>–NO<sub>x</sub>–VOC sensitivity features is also used to identify  
117 the precursor sensitivity regions and verify the results of the ISAM. In addition, the brute-force method is  
118 applied to investigate the effect of reducing anthropogenic emissions on the O<sub>3</sub> mass burden. Therefore, the  
119 precursor control type and contribution from specific geographic areas and emission sectors can be obtained,  
120 and some valuable information can be provided for control strategies in the NCP.

121

## 2. Methodology

CMAQ (version 5.0.2), released in April 2014 by the US EPA ([https://www.airqualitymodeling.org/index.php?title=CMAQ\\_version\\_5.0.2\\_\(April\\_2014\\_release\)\\_Technical\\_Documentation&oldid=587](https://www.airqualitymodeling.org/index.php?title=CMAQ_version_5.0.2_(April_2014_release)_Technical_Documentation&oldid=587)), was applied over the NCP for 2-month simulations in January and June 2015. Several updates and revisions, such as the chemical process corresponding to NH<sub>3</sub> and SO<sub>2</sub> and the secondary aerosol formation of SOA (secondary organic aerosol) and nitrate, have been added in this version. The updated and expanded version of the carbon bond mechanism (CB05) (Sarwar et al., 2008) and the sixth-generation modal CMAQ aerosol model (AERO6) were applied to simulate the gas-phase chemistry mechanisms and formation and the dynamic processes of aerosols, respectively. The ISORROPIA model (version 1.7) was used to describe the thermodynamic equilibrium of gas-particle transformation (Nenes et al., 1999). The highly versatile RAMS numerical code (Cotton et al., 2003), which can well simulate the boundary layer and the underlying surface, is utilized to provide the meteorological fields for CMAQ. **The mechanisms about secondary organic aerosol formation, on-line dust emission were modified for improving the simulation ability in China (Han et al., 2012; Li et al., 2017), and the information of underlying surface in China was also updated (Chen et al., 2018).**

The anthropogenic emissions of major pollution species (NO<sub>x</sub>, SO<sub>2</sub>, VOCs, BC, OC, primary PM<sub>2.5</sub>, and PM<sub>10</sub>) were obtained from the monthly-based emission inventory, with 0.25°×0.25° horizontal resolution and four categories (industry, power, transport, and residential), which were developed to support the Model Intercomparison Study Asia (Li et al., 2015). The original version of this emission inventory was developed for Asia as a contribution to the TRACE-P (Transport and Chemical Evolution over the Pacific) Mission and ACE-Asia (Asian Pacific Regional Aerosol Characterization Experiment) (Streets et al., 2003). Additionally, the NO<sub>x</sub> and NH<sub>3</sub> emissions from the soil and natural hydrocarbon emissions were obtained from the Global Emissions Inventory Activity 1°×1° global monthly inventory (Benkovitz et al., 1996). The Global Fire Emissions Database, Version 3 (FGEDv3.0; van der Werf et al., 2010), was applied to provide the biomass burning emissions from wildfires, savanna burning, and slash-and-burn agriculture. The VOCs and nitrogen oxides from flight exhaust, lighting, paint, fossil fuel, and other sectors were obtained from the regional emission inventory in Asia (REAS, Version 2, <http://www.jamstec.go.jp/frsgc/research/d4/emission.htm>) and the emission database for global atmospheric research (Olivier et al., 1994), respectively.

The ISAM module was used to track O<sub>3</sub> from different geographic regions and source types. This

152 source apportionment tool was developed from the TSSA (tagged species source apportionment; Wang et  
153 al., 2009) in an early version of the CMAQ model. Compared with the previous version, the ISAM  
154 improved the approach for the advection of tagged tracers and the tracking of precursor reactions and  
155 increased the flexibility of the application by minimizing the amount of data preparation (Kwok et al., 2013).  
156 An updated piecewise parabolic algorithm was applied to reasonably estimate the major dynamics  
157 processes, including advection transport, vertical diffusion, and dry deposition. For the nonlinear gas-phase  
158 chemical interactions, which are important for O<sub>3</sub> formation, a hybrid approach that employs the direct  
159 sensitivity methods as linear equations using lower and upper triangular matrices, which is known as LU  
160 decomposition (Yang et al., 1997), was applied for description. In addition, the ISAM uses two tracers for  
161 individual nitrogen and VOC species to represent the O<sub>3</sub> chemical formation regime attributed to either  
162 NO<sub>x</sub> or VOC emission sources. As described by Kwok et al. (2014), the total concentration of O<sub>3</sub> in each  
163 model grid cell is equal to the sum of O<sub>3</sub> tracers that were produced in either VOC- or NO<sub>x</sub>-sensitive  
164 conditions:

$$165 \quad O_3 \text{ bulk} = \sum_{tag} O_3 V_{tag} + \sum_{tag} O_3 N_{tag} \quad (1)$$

166 where O<sub>3</sub>V<sub>tag</sub> and O<sub>3</sub>N<sub>tag</sub> are the VOC-sensitive and NO<sub>x</sub>-sensitive O<sub>3</sub> attributed to each tag source,  
167 respectively. Therefore, the contribution from VOCs or NO<sub>x</sub> can be tracked individually, and the precursor  
168 control types in each grid can be deduced. Detailed information regarding the ISAM can be found in Kwok  
169 et al. (2013).

170 The simulation has two layer grids. The coarse domain covers East Asia (Figure 1, D1), with a  
171 horizontal grid spacing of 64 km and a total area of 6654 km×5440 km, and an inner domain (Figure 1, D2)  
172 with a 16 km×16 km resolution is two-way nested with the outer one. The inner domain covers the major  
173 regions of the NCP, including the megacity of Beijing, Tianjin, the capital city of the Shijiazhuang province,  
174 Jinan, the industrial town of Tangshan, and the Hebei, Shandong, and Shanxi provinces. The simulation  
175 used 15 vertical levels, of which nearly half were concentrated in the lowest 2 km, to improve the simulation  
176 of the atmospheric boundary layer. Numerous previous studies have demonstrated that this modeling system  
177 performs well in simulating the pollutant mass concentrations (Zhang et al., 2006; Han et al., 2014; Han et  
178 al., 2016)

179

### 180 **3. Model evaluation**

181 The meteorological parameters, such as the temperature and wind field, are important impact factors

182 of ozone formation and transport. Therefore, the daily average temperature, relative humidity, wind speed,  
183 and maximum wind direction in January and June 2015 were compared with the surface observation data  
184 (released by the Chinese National Meteorological Center: <http://data.cma.cn/>) for Beijing, Tianjin,  
185 Shijiazhuang, and Jinan. The comparison results are shown in Figure 2. The modeled temperature and  
186 relative humidity are shown to generally coincide with the observations at all four of these stations, except  
187 that some of the extreme high or low values appeared abruptly. The modeled wind speed, which could  
188 reproduce the higher value in Tianjin and Jinan and lower value in Beijing and Shijiazhuang, also followed  
189 the magnitude of observations well. However, a direct comparison between observed and modeled data is  
190 difficult, especially for the wind direction. Besides the obviously impact of surrounding surface at each  
191 measurement station, the time resolutions between observation (10 minute mean) and model output (1 hour)  
192 were also different. Nevertheless, the north wind in winter and south wind in summer were generally  
193 captured by the simulation results for all stations.

194 The modeled mass concentrations of O<sub>3</sub> and one of its precursors (NO<sub>2</sub>) were compared with the hourly  
195 observation data from the Ministry of Environmental Protection of China; the results are shown in Figures  
196 3 and 4. The statistical parameters the means, standard deviation, and correlation coefficients between the  
197 observations and simulations are listed in Tables 1 and 2. The nitrogen oxide and tropospheric ozone were  
198 two kinds of typical trace gases with high chemical activity and relatively short lifetimes. The diurnal  
199 change in Figures 3 and 4 is obvious, and the distinctive values of the mass concentrations between different  
200 seasons can also be found. The simulation results also reproduced these important features, especially the  
201 evident diurnal variation of O<sub>3</sub> at these four stations. The mass concentration of O<sub>3</sub> in summer was generally  
202 higher than that in winter because of the strong photochemistry during the daytime in summer. On the other  
203 hand, the metrics listed in Tables 1 and 2 were used to evaluate the model performance, following the study  
204 of Yu et al. (2006). Most of the correlation coefficients were higher than 0.5 for NO<sub>2</sub> and 0.6 for O<sub>3</sub>, which  
205 indicates that the model performed well in reproducing the observation trend. The simulation results were  
206 able to capture most of the pollution episodes during these two months. In addition, the standard deviations  
207 between the observation and simulation of NO<sub>2</sub> and O<sub>3</sub> were also similar in most cases. Most of the mean  
208 NO<sub>2</sub> concentration of simulation was generally similar with that of the observation in June, but about 25  
209 μg m<sup>-3</sup> lower at Tianjin in January. As shown in Figure 3, the model missed some of the high values of  
210 observation that appeared during the first half of January. The largest deviation of the modeled O<sub>3</sub>, which  
211 the mean mass burden was obviously higher than that of the observation and the correlation coefficient was

212 just 0.48, also appeared at Tianjin in January. Yu et al. (2010) reported similar results and noted that the  
213 model might not well resolve the titration by NO in an urban area under a low O<sub>3</sub> mass burden background  
214 by applying both the CB05 and SAPRC-99 mechanisms. Nevertheless, the comparison generally showed  
215 that the model could basically reproduce the meteorological field and mass concentration and trends of O<sub>3</sub>  
216 and its precursor NO<sub>2</sub> during different seasons over the NCP.

217

#### 218 4. Results and discussion

219 The surface spatial distributions of the monthly average values of the modeled NO<sub>x</sub>, VOCs, and  
220 maximum daily 8-hour average O<sub>3</sub> mass concentration (8H-O<sub>3</sub>) for January and June 2015 are shown in  
221 Figure 5. The monthly average wind field is also shown. The diffusion condition is shown to have been  
222 weak due to the obviously smaller wind speed over Beijing, Tianjin, Hebei, Shandong, and northern Henan  
223 in both January and June. In addition to the strong emission, the weak diffusion condition should be the  
224 main reason for the high mass burden of NO<sub>x</sub> and VOCs in these regions. In addition, the maximum values  
225 were mainly concentrated in the urban areas of the NCP during these two months, including the following  
226 five major pollution cities: Beijing, Tianjin, Shijiazhuang, Jinan, and Tangshan. However, the distribution  
227 patterns between O<sub>3</sub> and the precursors were significantly different, which indicates that the formation and  
228 transport processes of O<sub>3</sub> should be complex in the NCP. Unlike the seasonal variation of NO<sub>x</sub> and VOCs,  
229 the mass burden of O<sub>3</sub> in summer was obviously higher than that in winter because of the stronger  
230 photochemical activity. The 8H-O<sub>3</sub> mass concentration, which exceeded the Grade II standard (160 μg m<sup>-3</sup>),  
231 was widespread throughout southern Beijing, Hebei and almost the entire areas of Tianjin and Shandong,  
232 with values reaching 180-200 μg m<sup>-3</sup> in the tri-province area of Hebei, Shandong, and Henan in June. The  
233 serious O<sub>3</sub> pollution was mainly concentrated in the northwest part of the Shandong province.

234 The contribution of O<sub>3</sub> from the major NCP regions, including Beijing, Hebei, Shandong, Tianjin, and  
235 Shanxi, was calculated using ISAM-CMAQ-RAMS; the results are shown in Figure 6 (NS: NO<sub>x</sub>-sensitive  
236 O<sub>3</sub>) and Figure 7 (VS: VOC-sensitive O<sub>3</sub>). The total percentage can be obtained by summing the  
237 contributors of NS and VS and shown in Table 3. The distribution patterns of NS and VS contributions  
238 were generally similar to each other. The mass contribution of O<sub>3</sub> in Shandong, Hebei, and Shanxi was  
239 mainly provided by local anthropogenic sources, and the local contribution could reach 36.6%, 53.6%, and  
240 45.0%. However, the local sources did not provide the primary contributions in Beijing (23.1%) and Tianjin  
241 (14.9%), and the regional transport contributions from Hebei and Shandong could reach 35.2% and 37.3%



242 to these two cities, respectively. This feature clearly indicates that the regional transport of precursors  
243 should be an important factor of O<sub>3</sub> pollution in Beijing and Tianjin. The contribution from Shanxi to other  
244 regions was very small due to the hindrance to pollutant transport caused by the Taihang Mountains, which  
245 are located to the east of the Shanxi province. The contribution from other regions to Shanxi was also very  
246 low in corresponding as shown in Table 3. In addition, the contribution from Shandong provided at least  
247 more than 65% to the mass burden of O<sub>3</sub> in the Bohai Sea. This feature explains the source of the large  
248 value that appears over this area in Figure 4. On the other hand, the contribution of VS was obviously higher  
249 than that of NS in Beijing, Tianjin, Hebei, and Shandong. Compared with the NS, the percentage of VS was  
250 generally double in Beijing and Tianjin and more than 10% higher in all of Shandong and the southern part  
251 of Hebei. In contrast, the contribution of NS was clearly higher than that of VS in Shanxi, which means  
252 that the major role of the O<sub>3</sub> formation in Shanxi should be different from that in other regions.

253 To distinguish the O<sub>3</sub>–NO<sub>x</sub>–VOC sensitivity features, a method that is suitable for the results of three-  
254 dimensional chemistry/transport models was applied to identify the precursor sensitivity regions in the NCP.  
255 In addition to the base case, two sensitivity tests, which reduced 30% of the VOC emissions and 30% of  
256 the NO<sub>x</sub> emissions, respectively, within the entire model domain, were conducted. Then, the deviation of  
257 the maximum daily 8H-O<sub>3</sub> between the base case and these two sensitivity tests could be utilized to  
258 determine the precursor control types in each grid. Here, we used  $\Delta O_{3V}$  and  $\Delta O_{3N}$  to represent the variation  
259 of the mass concentration of O<sub>3</sub> due to the reduction in VOC or NO<sub>x</sub> emission, respectively (Sillman and  
260 He, 2002; Sillman and West, 2009): (1) if the changes in  $\Delta O_{3V}$  and  $\Delta O_{3N}$  were both less than 4  $\mu\text{g m}^{-3}$ , this  
261 grid was likely controlled by neither NO<sub>x</sub> nor VOCs; (2) if  $\Delta O_{3N}$  increased to a value greater than 4  $\mu\text{g m}^{-3}$   
262 and  $\Delta O_{3V}$  decreased to a value less than 4  $\mu\text{g m}^{-3}$ , this grid should be regarded as “NO<sub>x</sub> titration”; (3) if  
263  $\Delta O_{3V}$  decreased by more than 4  $\mu\text{g m}^{-3}$ , with this reduction being twice as large as the  $\Delta O_{3N}$  reduction (or  
264  $\Delta O_{3N}$  increase), this grid was likely controlled by VOCs; (4) if  $\Delta O_{3N}$  decreased by more than 4  $\mu\text{g m}^{-3}$ , with  
265 the reduction being twice as large as the  $\Delta O_{3V}$  reduction, this grid was likely controlled by NO<sub>x</sub>; (5) if  $\Delta O_{3N}$   
266 and  $\Delta O_{3V}$  both decreased by more than 4  $\mu\text{g m}^{-3}$  and the ratio between them was less than 2:1 or 1:2, this  
267 grid was likely controlled by both NO<sub>x</sub> and VOCs. Details regarding the identification explained above can  
268 be found in Figure 8(f). The frequency of precursor control types in each grid in June was determined and  
269 is shown in Figure 8(a-e). The NO<sub>x</sub> titration scarcely appeared in the model domain. The frequency of the  
270 “no control” type entirely exceeded 50% over the background regions when the O<sub>3</sub> mass burden was lower  
271 than 120  $\mu\text{g m}^{-3}$  and gradually decreased as the O<sub>3</sub> mass burden increased. Over the O<sub>3</sub> pollution areas, a

272 grid with a “no control”-type frequency higher than 10% was seldom found. Specific to the considered  
273 regions, the urban area of Beijing, Tianjin, Tangshan, southern Hebei, and northern and western Shandong  
274 were mainly under VOC control, while the outer suburb of Beijing, all of Shanxi, and northern Hebei were  
275 mainly under NO<sub>x</sub> control. The “both control” type generally appeared in the transitional zone between  
276 NO<sub>x</sub> and VOC control. Compared with the results shown in Figures 6 and 7, the distribution feature of NO<sub>x</sub>  
277 and VOC contributions highly coincided with that of the O<sub>3</sub> precursor sensitivity types, which demonstrated  
278 that this method is reliable.

279 In addition to the contribution feature of emission sources estimated using the ISAM, the effect of  
280 reducing anthropogenic emissions on the O<sub>3</sub> mass burden was also necessary to learn because the formation  
281 of O<sub>3</sub> from NO<sub>x</sub> and VOC emissions is a typical nonlinear process. The brute-force method, which can  
282 realistically capture the nonlinear processes of secondary pollutant formation, was applied. Therefore,  
283 several sensitivity tests were designed, as shown in Table 4. First, the zero-out (100% source removal)  
284 simulations of four major sectors, i.e., industry, power plants, transport, and residential (sensitivity tests ZI,  
285 ZP, ZT, and ZR, respectively), were conducted to evaluate the efficiency of emission reduction for different  
286 sources in the NCP. Figure 9 presents the results of the brute-force sensitivity tests and the NO<sub>x</sub> and VOC  
287 emission flux of each major sector. The removal of the industry sector is shown to have been the most  
288 efficient way to decrease the O<sub>3</sub> mass burden, and the variation of 8H-O<sub>3</sub> between 20 and 30 μg m<sup>-3</sup> was  
289 generally concentrated in the high mass concentration regions. The main reason is likely that the VOC  
290 emission flux of the industry sector was significantly higher than that of the other sectors. Removal of the  
291 residential sector could also decrease the O<sub>3</sub> mass burden in most of the VOC control regions due to its  
292 VOC emission flux being notably higher than that of NO<sub>x</sub>. In contrast, removal of the transport and power  
293 plant sectors could not effectively reduce the O<sub>3</sub> mass burden and even increased the mass burden in high  
294 pollution areas, such as southern Beijing, Tianjin, Tangshan, southern Hebei, Jinan, and other parts of  
295 Shandong. The NO<sub>x</sub> emission flux of these two kinds of sectors was clearly higher than that of VOCs,  
296 especially for the power plant sector. It also caused the 8H-O<sub>3</sub> mass burden to decrease by 5-10 μg m<sup>-3</sup> in  
297 Shanxi as a result of the removal of the power plant sector. **It can be deduced that the ambient NO<sub>x</sub> mass  
298 burden should be plentiful and restrained the O<sub>3</sub> formation because of the reaction below:**

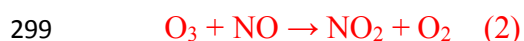

300 **Therefore, the environmental condition would be benefit for the O<sub>3</sub> formation when the NO<sub>x</sub> mass burden  
301 decrease due to power plant or transport sector removal.** In summary, if we focus on the major pollution

302 regions of the NCP, including Beijing, Tianjin, Hebei, and Shandong, reduction of the industry and  
303 residential emission sectors should be an effective way to control the O<sub>3</sub> mass burden during heavy O<sub>3</sub>  
304 pollution episodes.

305 In addition, the realistic pollution control strategies are supposed to be applied to a specific sector in  
306 the high emission regions (HERs) and used to develop a comprehensive reduction scheme; thus, a detailed  
307 analysis is necessary to investigate more accurate and practical strategies. Other than applying the simple  
308 zero-out sensitivity test over entire objective regions, we selected the regions that include cities and towns  
309 with high anthropogenic emission flux in the Beijing, Tianjin, Hebei, and Shandong (BTHS) region to more  
310 accurately match real emission control. Figure 10 presents the selected regions and the emission flux of  
311 NO<sub>x</sub> and VOCs from the industry sector, residential sector, and multiple combinations. First, the change in  
312 8H-O<sub>3</sub> mass concentration associated with the anthropogenic emission in selected regions (Figures 10(i)  
313 and 10(j)) was compared with that in the entire BTHS region (sensitivity tests A20%-HERs and A20%-  
314 BHTS), as shown in Figures 11(a) and 11(b), respectively. The distribution patterns of the 8H-O<sub>3</sub> mass  
315 burden variation were notably similar to each other, and the positive and negative values generally appeared  
316 in the same regions. However, the negative value in Figure 11(b) was clearly higher than that in Figure  
317 11(a). This disparity indicates that significant overestimation of the O<sub>3</sub> mass burden variation might occur  
318 when we conduct a brute-force sensitivity test with broad reductions in emissions in the entire objective  
319 regions.

320 According to the results of the zero-out sensitivity tests, the industry and residential sectors were the  
321 major emission sources of O<sub>3</sub>, while the power plant sector did not benefit O<sub>3</sub> formation. Thus, the effects  
322 of reducing these industry and residential sectors were estimated using the brute-force method with 20%  
323 emission intensity in the selected regions of BTHS (Figures 10(a) and 10(b)). Figures 11(c) and 11(d) show  
324 the variation of O<sub>3</sub> associated with the industry and residential emission sectors (sensitivity tests I20%-  
325 HER and R20%-HER), respectively. The 8H-O<sub>3</sub> mass concentration could decrease by 10-12 μg m<sup>-3</sup> in  
326 most of Shandong, especially in the strong polluted regions shown in Figure 11(c). In contrast, the value  
327 slightly increased in the urban areas of Shijiazhuang, Tianjin, and Tangshan. In Figure 5(f), the 8H-O<sub>3</sub> mass  
328 burden was relatively lower in these regions. Thus, the O<sub>3</sub> mass burden can be decreased rapidly by  
329 controlling the industry emissions under a heavy O<sub>3</sub> pollution background. Figure 11(d) shows that the 8H-  
330 O<sub>3</sub> mass concentration decreased overall in BTHS, though the range was only 1-5 μg m<sup>-3</sup>. The likely main  
331 reason is that the emission of VOCs was higher than that of NO<sub>x</sub> from the residential sector, while the

332 emission intensity from the residential sector was relatively lower than that from industry. The mass burden  
333 of O<sub>3</sub> can also be reduced by controlling the residential emissions in the urban areas of Shijiazhuang, Tianjin,  
334 and Tangshan.

335 In addition, the influence of different combinations of emission sectors in BTHS was discussed.  
336 Figures 11(e) and 11(f) present the change in 8H-O<sub>3</sub> mass concentration associated with a 20% emission  
337 intensity for both the industry and residential sectors (sensitivity test IR20%-HERs) and the industry,  
338 transport, and residential sectors (sensitivity test ITR20%-HERs), respectively. The O<sub>3</sub> mass burden  
339 generally decreased sharply in BTHS, as shown in Figure 11(e), especially in the regions of Shandong with  
340 heavy pollution. The range and magnitude of decrease can obviously be enhanced while considering the  
341 reduction of the transport sector, as shown in Figure 11(f). Notably, the mass concentration of 8H-O<sub>3</sub> could  
342 decrease from 180-200 μg m<sup>-3</sup> to 160-180 μg m<sup>-3</sup> in the polluted regions of BTHS. Compared with the zero-  
343 out sensitivity test in Figure 9, the decrease in 8H-O<sub>3</sub> mass burden in Figure 11(f) was still clearly lower  
344 than that of ZI. This deviation indicates that the contribution source from other regions except BTHS should  
345 also be important. Even though 80% of the emission intensity was removed, the reduction in 8H-O<sub>3</sub> mass  
346 concentration still barely exceeded 20 μg m<sup>-3</sup> in the NCP, as shown in Figures 11(c), 11(d), and 11(e), which  
347 means that it was difficult to keep the O<sub>3</sub> mass burden under the Grade II standard by controlling only the  
348 industry and residential emission sectors in HERs.

349 Therefore, more brute-force sensitivity tests with HERs emissions varied from 50% to 0% were  
350 conducted. The regional average 8H-O<sub>3</sub> mass concentrations in Beijing, Tianjin, Shijiazhuang, Jinan, and  
351 Tangshan with changes in emission are shown in Figure 12. Three series of sensitivity tests were conducted:  
352 reduction of the IR (industry and residential), ITR (industry, transport, and residential) and All (industry,  
353 transport, power plant, and residential) emission sectors. As shown, the 8H-O<sub>3</sub> mass concentration was  
354 higher than 160 μg m<sup>-3</sup> in all five cities, while the emission percentage was 100%. When the emissions  
355 reduced to 50%, the 8H-O<sub>3</sub> mass concentrations of these three series slightly decreased for Beijing, Tianjin,  
356 Tangshan, and Jinan but increased for Shijiazhuang. The decrease in 8H-O<sub>3</sub> mass concentration as a result  
357 of reducing the IR emission was similar to that of the ITR emission when the emissions were reduced from  
358 50% to 40% for all five cities but was not significant when the reduction was less than 40%. The lines  
359 corresponding to the ITR and All emission sectors generally decreased coherently for these five cities when  
360 the emissions were reduced from 50% to 30%. However, the effect of the ITR reduction was obviously  
361 weaker than that of the All reduction when the reduction was less than 30%. The decrease in 8H-O<sub>3</sub> mass

burden exceeded  $12 \mu\text{g m}^{-3}$  when the All emission reduction was least, and the air quality in all five of these cities could reach the Grade II standard. This phenomenon indicated that the influence of the transport and power plant emission sectors on the decrease in  $\text{O}_3$  mainly occurred after removing 60% of the IR or 70% of the ITR emission intensity, respectively. Thus, an emission control sequence for different sectors should be considered when exploring more effective strategies.

## 5. Conclusions

In this study, an air quality modeling system referred to as RAMS-CMAQ was applied to simulate the  $\text{O}_3$  mass concentration, and several sensitivity tests were conducted to investigate the  $\text{O}_3$  pollution and to discuss the relationship between  $\text{O}_3$  production and emission contributions over the NCP in January and June of 2015. First, the modeled daily meteorological factors (temperature, relative humidity, and wind field) and hourly mass concentrations of  $\text{O}_3$  and its precursor  $\text{NO}_2$  were compared with ground-based observation data to evaluate the accuracy and reliability. The simulation results were generally good and able to broadly capture the values and variation trend of the observation data. Focusing on the heavy  $\text{O}_3$  pollution period in June, an advanced source apportionment tool called ISAM was coupled with RAMS-CMAQ and applied to estimate the regional transport contributions, with individual tracers for nitrogen and VOC species used to represent the  $\text{O}_3$  chemical formation regime attributed to either  $\text{NO}_x$  or VOC emission sources in the NCP. Then, a unique method that is suitable for three-dimensional chemistry/transport models was used to distinguish the  $\text{O}_3$ - $\text{NO}_x$ -VOC sensitivity features and identify the precursor sensitivity in each grid of the model domain. Therefore, the  $\text{O}_3$  mass burden sensitivities to  $\text{NO}_x$  and VOC emission changes and the correlative regional transport contribution features among major anthropogenic source regions in the NCP can be clearly investigated using these methods. In addition, several brute-force sensitivity tests were conducted to discuss the role of the main anthropogenic emission sectors on reducing the  $\text{O}_3$  mass burden, and an attempt was made to provide valuable suggestions for exploring more effective strategies for preventing  $\text{O}_3$  pollution. The results are summarized as follows:

1. The simulation results show that the seasonal variation of  $\text{O}_3$  was significant and that the heavy mass burden of 8H- $\text{O}_3$ , which exceeded the Grade II standard, generally occurred in southern Beijing, Hebei and almost all of Tianjin and Shandong in June. The mass burden of 8H- $\text{O}_3$  reached  $180\text{-}200 \mu\text{g m}^{-3}$  mainly in the tri-province area of Hebei, Shandong, and Henan. The distribution pattern and seasonal variation of 8H- $\text{O}_3$  were obviously different from those of its precursors, which indicates that the formation and

392 transport processes of O<sub>3</sub> should be complex in the NCP.

393 2. The results of RAMS-CMAQ-ISAM show that the emission sources in Shandong and Hebei were  
394 the major contributors to O<sub>3</sub> production in the NCP. In addition to these two provinces, the O<sub>3</sub> mass burden  
395 in Beijing and Tianjin was also significant. The emissions from Hebei and Shandong contributed 15-20%  
396 and 5-10% to Beijing and 10-20% and 15-20% to Tianjin, respectively. However, the O<sub>3</sub> mass burden in  
397 these two provinces was generally contributed by the provinces themselves. The results also show that the  
398 contribution of VS was clearly higher than that of NS in Beijing, Tianjin, Hebei, and Shandong, which  
399 indicates that the O<sub>3</sub> mainly originated from VOC emission sources. On the other hand, the emission sources  
400 in the Shanxi province almost had no impact on the O<sub>3</sub> mass burden in other regions of the NCP due to the  
401 hinderance to pollutant transport provided by the Taihang Mountains.

402 3. The results of identification of the O<sub>3</sub>-NO<sub>x</sub>-VOC sensitivity feature show that the VOC control  
403 mainly occurred over all of Tianjin and Tangshan and southern Beijing (urban area) and Hebei, where the  
404 O<sub>3</sub> mass concentration reached 160-180 μg m<sup>-3</sup>. The north central part of Shandong and urban area of Jinan  
405 were also mainly under the VOC control. The frequencies of VOC control and the "both control" type was  
406 generally equal in the region of Hebei and Shandong where the O<sub>3</sub> mass concentration reached 180-200 μg  
407 m<sup>-3</sup>. The NO<sub>x</sub> control generally appeared in the regions of the NCP where the O<sub>3</sub> mass concentration reached  
408 120-160 μg m<sup>-3</sup>. In the major cities with O<sub>3</sub> pollution, including Beijing, Tianjin, Shijiazhuang, and Jinan,  
409 the O<sub>3</sub>-NO<sub>x</sub>-VOC sensitivity feature was the same: VOC control dominated the urban area, while "both  
410 control" and NO<sub>x</sub> control dominated the suburban and remote areas, respectively.

411 4. The results of the zero-out sensitivity tests show that the IR emission sectors were two important  
412 contributors to ozone formation, as they were the major sources of VOCs, while the power plant emission  
413 sector did not benefit O<sub>3</sub> pollution control in the high mass burden regions due to the greater emission of  
414 NO<sub>x</sub> versus VOCs.

415 On the other hand, the results of the brute-force sensitivity tests show that the effects of IR, ITR, and  
416 All emission control on the decrease in O<sub>3</sub> were similar when their reduction percentages were higher than  
417 40%. Meanwhile, the effects of ITR and All emission control were similar while the reduction percentages  
418 were higher than 30%. When the reduction percentage dropped below 30%, the nonlinearity of O<sub>3</sub>  
419 formation was notable, and the power plant sector could make significant contributions to the decrease in  
420 O<sub>3</sub>. Thus, the control strategies should be promptly adjusted based on the emission reduction, and the  
421 emission sector combination should be precisely chosen to achieve better efficiency. The modeling system

422 allows us to capture valuable information regarding how to choose the correct sequence and efficient  
423 combinations by exploring the key thresholds from the bulk of sensitivity tests regarding crucial parameters.

424  
425  
426  
427  
428  
429  
430  
431  
432  
433  
434  
435  
436  
437  
438  
439  
440  
441  
442  
443  
444  
445  
446  
447  
448  
449  
450  
451

## References

- Benkovitz, C. M., Schultz, M.T., Pacyna, J., Tarrason, L., Dignon, J., Voldner, E.C., Spiro, P.A., Logan, A., and Graedel, T.E.: Global gridded inventories of anthropogenic emissions of sulfur and nitrogen, *J. Geophys. Res.*, 101(29), 239-253, 1996.
- Castell, N., Stein, A., Mantilla, E., Salvador, R., and Millan, M.: Evaluation of the use of photochemical indicators to assess ozone-NO<sub>x</sub>-VOC sensitivity in the Southwestern Iberian Peninsula, *J. Atmos. Chem.*, 63(1), 73-91, 2009.
- Chen, L., Zhang, M., Zhu, J., Wang, Y., Skorokhod, A.: Modeling Impacts of Urbanization and Urban Heat Island Mitigation on Boundary Layer Meteorology and Air Quality in Beijing Under Different Weather Conditions, *J. Geophys. Res.*, 123(8), 4323-4344, 2018.
- Cotton, W. R., Pielke, R. A., Walko, R. L., Liston, G. E., Tremback, C. J., Jiang, H., McAnelly, R. L., Harrington, J. Y., Nicholls, M. E., Carrico, G. G., and McFadden, J. P.: RAMS 2001: current status and futures directions, *Meteor. Atmos. Phys.*, 82, doi:10.1007/s00703-001-0584-9, 2003.
- Deng, X., Zhou, X., Wu, D., Tie, X., Tan, H., Li, F., Bi, X., Deng, T., and Jiang, D.: Effect of atmospheric aerosol on surface ozone variation over the Pearl River Delta region, *Sci. China Earth Sci.*, 54(5), 744-752, 2011.
- Dufour, G., Fremenko, M., Orphai, J., and Flaud, J.: IASI observations of seasonal and day-to-day variations of tropospheric ozone over three highly populated areas of China: Beijing, Shanghai, and Hong Kong, *Atmos. Chem. Phys.*, 10, 3787-3801, 2010.
- Gao, W., Tang, G., Ji, D., and Wang, Y.: Implementation effects and countermeasures of China's air pollution prevention and control action plan, *Res. Environ. Sci.*, 29(11), 1567-1574, 2016. (In Chinese)
- Han, X., Ge, C., Tao, J., Zhang, M., Zhang, R.: Air Quality Modeling for a Strong Dust Event in East Asia in March 2010, *Aerosol Air Qual. Res.*, 12: 615-628.
- Han, X., Zhang, M., Gao, J., Wang, S., Chai, F.: Modeling analysis of the seasonal characteristics of haze formation in Beijing, *Atmos. Chem. Phys.*, 14, 10231-10248, 2014.
- Han, X., Zhang, M., Zhu, L., Skorokhod, A.: Assessment of the impact of emissions reductions on air quality over North China Plain, 7, 249-259, 2016.
- Kleinman, L. I., Daum, P. H., Lee, Y. N., Nunnermacker, L. J., Springston, S. R., Lloyd, J., and Rudolph, J.: Ozone production efficiency in an urban area, *J. Geophys. Res.*, 107, D23, 23, 2002.
- Kwok, R. H. F., Baker, K. R., Napelenok, S. L., and Tonnesen, G. S.: Photochemical grid model implementation and application of VOC, NO<sub>x</sub>, and O<sub>3</sub> source apportionment, *Geosci. Model Dev.*, 7(5), 99-114, 2014.
- Kwok, R., Napelenok, S., and Baker, K.: Implementation and evaluation of PM<sub>2.5</sub> source contribution analysis in a photochemical model, *Atmos. Environ.*, 80, 398-407, 2013.
- Li, H., Zhang, Q., Chen, C., Wang, L., Wei, Z., Zhou, S., Parworth, C., Zheng, B., Canonaco, F., Prevot, A., Chen, P., Zhang, H., and He, K.: Wintertime aerosol chemistry and haze evolution in an extremely polluted city of North China Plain: significant contribution from coal and biomass combustions, *Atmos. Chem. Phys.*, 17, 4751-4768, 2017.
- Li, J., Zhang, M., Wu, F., Sun, Y., Tang, G.: Assessment of the impacts of aromatic VOC emissions and yields of SOA on SOA concentrations with the air quality model RAMS-CMAQ, *Atmos. Environ.*, 158, 105-115.
- Li, M., Zhang, Q., Kurokawa, J., Woo, H., He, K., Lu, Z., Ohara, T., Song, Y., Streets, D., Carmichael, G., Cheng, Y., Huo, H., Liu, F., Su, H., and Zhang, B.: MIX: a mosaic Asian anthropogenic emission



496 inventory for the MICS-Asia and the HTAP projects, *Atmos. Chem. Phys. Discuss*, 15, 34813-34869,  
497 2015.

498 Lin, W., Xu, X., Zhang, X., and Tang, J.: Contributions of pollutants from North China Plain to surface  
499 ozone at the Shangdianzi GAW Station, *Atmos. Chem. Phys.*, 8, 5889-5898, 2008.

500 Liu, X., Zhang, Y., Xing, J., Zhang, Q., Wang, K., Streets, D., Jang, C., Wang, W., and Hao, J.:  
501 Understanding of regional air pollution over China using CMAQ, part II. Process analysis and  
502 sensitivity of ozone and particulate matter to precursor emissions, *Atmos. Environ.*, 44, 3719-3727,  
503 2010.

504 Nenes, A., Pilinis, C., and Pandis, S.N.: Continued development and testing of a new thermodynamic  
505 aerosol module for urban and regional air quality models, *Atmos. Environ.*, 33, 1553-1560, 1999.

506 Nie, T., Li, X., Wang, X., Shao, M., and Zhang, Y.: Characteristics of the Spatial Distributions of Ozone-  
507 Precursor Sensitivity Regimes in Summer over Beijing, *Acta Scientiarum Naturalium Universitatis*  
508 *Pekinensis*, 50(3), 557-564, 2014. (in Chinese)

509 Olivier, J., Bouwman, A., Maas, C., and Berdowski, J.: Emission database for global atmospheric research,  
510 *Environ. Monit. Assess.*, 31, 93-106., 1994.

511 Ran, L., Zhao, C., Xu, W., Han, M., Lu, X., Han, S., Lin, W., Xu, X., Gao, W., Yu, Q., Geng, F., Ma, N.,  
512 Deng, Z., and Chen, J.: Ozone production in summer in the megacities of Tianjin and Shanghai,  
513 China: a comparative study, *Atmos. Chem. Phys.*, 12, 7531-7542, 2012.

514 Sarwar, G., Luecken, D., Yarwood, G., Whitten, G. Z., Carter, W. P. L.: Impact of an updated carbon bond  
515 mechanism on predictions from the CMAQ modeling system: preliminary assessment, *J. Appl.*  
516 *Meteor. Climatol.*, 47, 3-14, 2008.

517 Sillman, S. and He, D.: Some theoretical results concerning O<sub>3</sub>-NO<sub>x</sub>-VOC chemistry and NO<sub>x</sub>-VOC  
518 indicators, *J. Geophys. Res.*, 107(D22): ACH-1-ACH 26-15, 2002.

519 Sillman, S. and West, J.: Reactive nitrogen in Mexico City and its relation to ozone-precursor sensitivity:  
520 results from photochemical models, *Atmos. Chem. Phys.*, 9, 3477-3489, 2009.

521 Streets, D., Bond, T., Carmichael, G., Fernandes, S., Fu, Q., He, D., Klimont, Z., Nelson, S. M., Tsai, N. Y.,  
522 Wang, : An inventory of gaseous and primary aerosol emissions in Asia in the year 2000, *J. Geophys.*  
523 *Res.*, 108, DOI: 10.1029/2002JD003093, 2003.

524 Tang, G., Wang, Y., Li, X., Ji, D., Hsu, S., Gao, X.: Spatial-temporal variations in surface ozone in Northern  
525 China as observed during 2009–2010 and possible implications for future air quality control  
526 strategies, *Atmos. Chem. Phys.*, 12, 2757-2776, 2012.

527 Tang, G., Zhu, X., Xin, J., Hu, B., Tao, S., Sun, Y., Zhang, J., Wang, L., Cheng, M., Chao, N., Kong, L., Li,  
528 X., and Wang, Y.: Modelling study of boundary-layer ozone over northern China - Part I: Ozone  
529 budget in summer, *Atmos. Res.*, 187, 128-137, 2017.

530 Tao, M., Chen, L., Su, L., and Tao, J.: Satellite observation of regional haze pollution over the North China  
531 Plain, *J. Geophys. Res.*, 117, D12203, doi:10.1029/2012JD017915, 2012.

532 van der Werf, G. R., Randerson, J. T., Giglio, L., Collatz, G. J., Mu, M., Kasibhatla, P. S., Morton, D. C.,  
533 DeFries, R. S., Jin, Y., van Leeuwen, T. T.: Global fire emissions and the contribution of deforestation,  
534 savanna, forest, agricultural, and peat fires (1997-2009), *Atmos. Chem. Phys.*, 10, 11707-11735, 2010.

535 Wang, X., Sun, M., Yang, T., and Wang, Z.: Interdecadal change in frequency of dust-haze episodes in  
536 North China Plain, *Clim. Environ. Res.*, 18, 165–170, 2013 (in Chinese).

537 Wang, Y., Konopka, P., Liu, Y., Chen, H., Muller, R., Ploger, F., Riese, M., Cai, Z., and Lu, D.: Tropospheric  
538 ozone trend over Beijing from 2002–2010: ozonesonde measurements and modeling analysis, *Atmos.*  
539 *Chem. Phys.*, 12, 8389-8399, 2010.

- 540 Wang, Z. S., Chien, C. J., Tonnesen, G. S.: Development of a tagged species source apportionment  
541 algorithm to characterize three-dimensional transport and transformation of precursors and secondary  
542 pollutants, *J. Geophys. Res.*, 114, D21. DOI: 10.1029/2008JD010846, 2009.
- 543 Wu, R. and Xie, S.: Spatial Distribution of Ozone Formation in China Derived from Emissions of Speciated  
544 Volatile Organic Compounds, *Environ. Sci. Technol.*, 51(5), 2574-2583, 2017.
- 545 Xing, J., Wang, S., Zhu, Y.: Nonlinear response of ozone to precursor emission Changes in China: A  
546 modeling study using response surface methodology, *Atmos. Chem. Phys.*, 11(10):5027-5044, 2010.
- 547 Yang, Y., Wilkinson, J., and Russell, A.: Fast, direct sensitivity analysis of multi-dimensional  
548 photochemical models, *Environ. Sci. Technol.*, 31(10), 2859–2868, 1997.
- 549 Yu, S. C., Eder, B., Dennis, R., Chu, S. H., and Schwartz, S.: New unbiased symmetric metrics for  
550 evaluation of air quality models, *Atmos. Sci. Lett.*, 7, 26–34, 2006.
- 551 Yu, S., Mathur, R., Sarwar, G., Kang, D., Tong, D., Pouliot, G. and Pleim, J.: Eta-CMAQ air quality  
552 forecasts for O<sub>3</sub> and related species using three different photochemical mechanisms (CB4, CB05,  
553 SAPRC-99): comparisons with measurements during the 2004 ICARTT study, *Atmos. Chem. Phys.*,  
554 10, 3001–3025, 2010.
- 555 Zhang, M., Uno, I., Zhang, R., Han, Z., Wang, Z., and Pu, Y.: Evaluation of the Models-3 Community  
556 Multi-scale Air Quality (CMAQ) modeling system with observations obtained during the TRACE-P  
557 experiment: comparison of ozone and its related species, *Atmos. Environ.*, 40, 4874-4882, 2006.
- 558 Zhou, S., Yang, L., Gao, R., Wang, X., Gao, X., Nie, W., Xu, P., Zhang, Q., and Wang, W.: A comparison  
559 study of carbonaceous aerosols in a typical North China Plain urban atmosphere: Seasonal variability,  
560 sources and implications to haze formation, *Atmos. Environ.*, 149, 95-103, 2017.

561  
562  
563  
564  
565  
566  
567  
568  
569  
570  
571  
572  
573  
574  
575  
576  
577  
578  
579  
580  
581  
582  
583

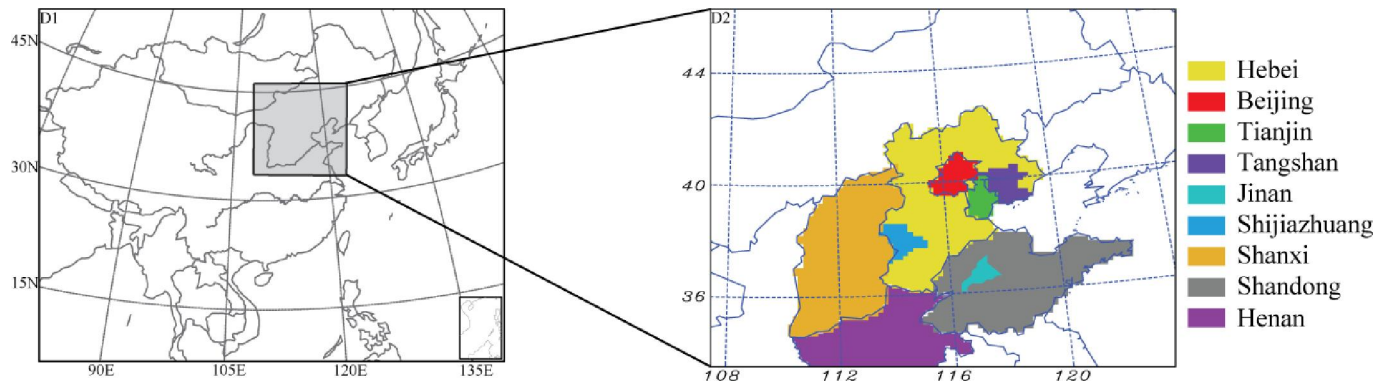

Figure 1 The model domain of this study, and the geographic locations of Beijing, Tianjin, Tangshan, Hebei, Shijiazhuang, Shanxi, Shandong, Jinan, and Henan.

584  
585  
586  
587  
588  
589  
590  
591  
592  
593  
594  
595  
596  
597  
598  
599  
600  
601  
602  
603  
604  
605  
606  
607  
608  
609  
610  
611  
612  
613  
614  
615  
616  
617  
618  
619

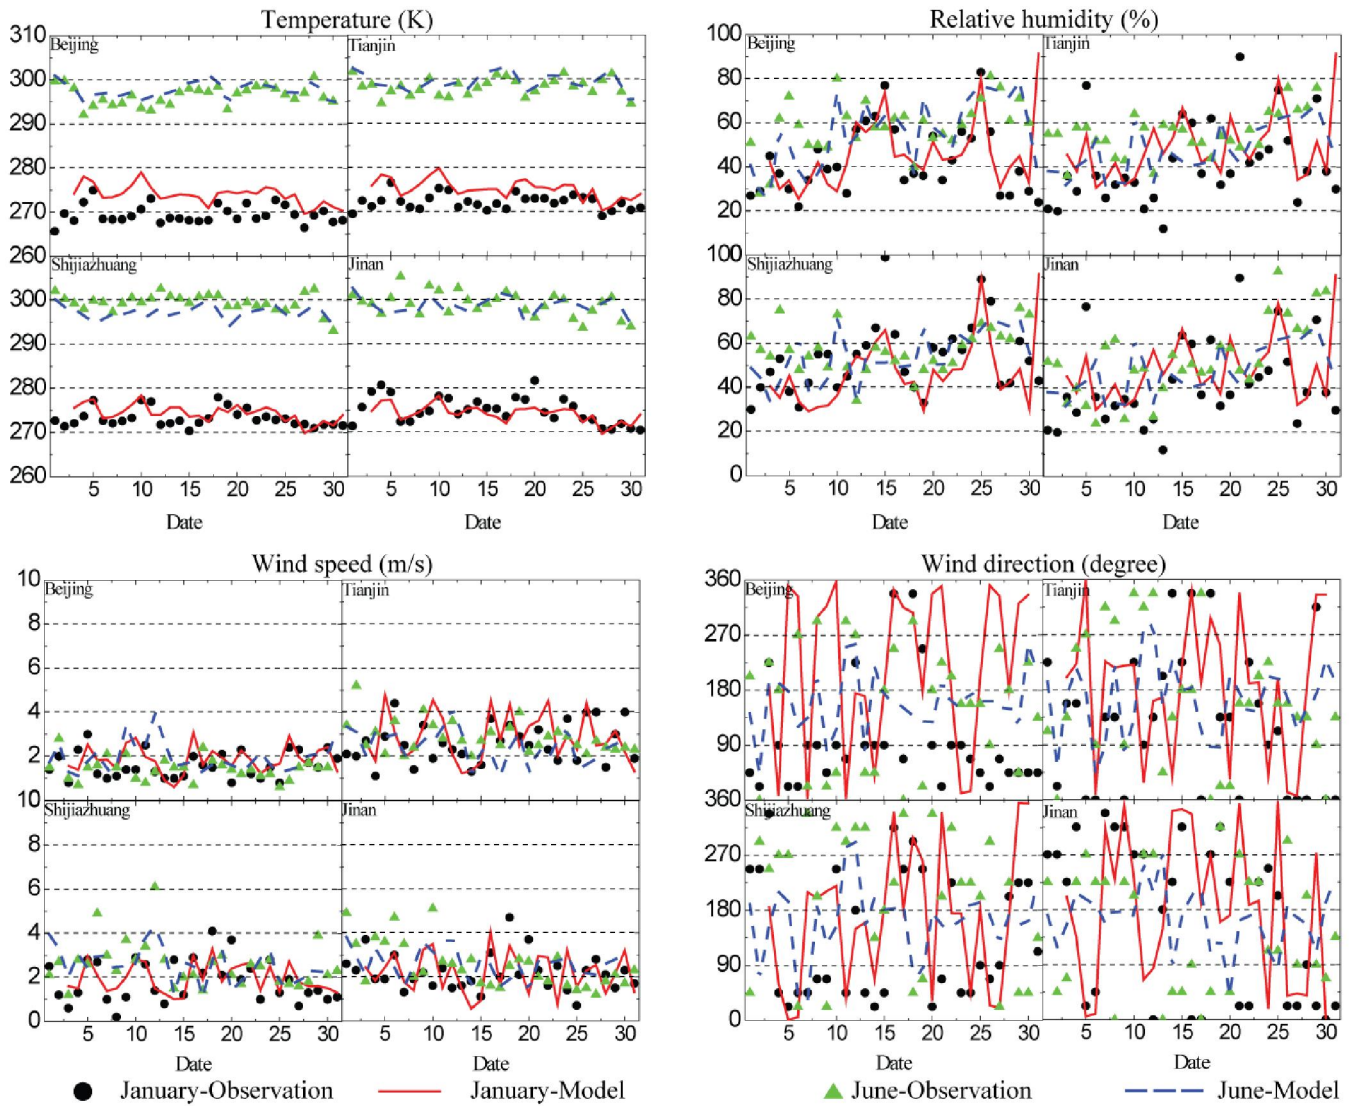

620  
 621 Figure 2. Observed and modeled daily average temperatures (K), relative humidity (%), wind speed (m/s), and maximum  
 622 wind direction at four stations in January and June 2015.  
 623  
 624  
 625  
 626  
 627  
 628  
 629  
 630  
 631  
 632  
 633  
 634  
 635  
 636

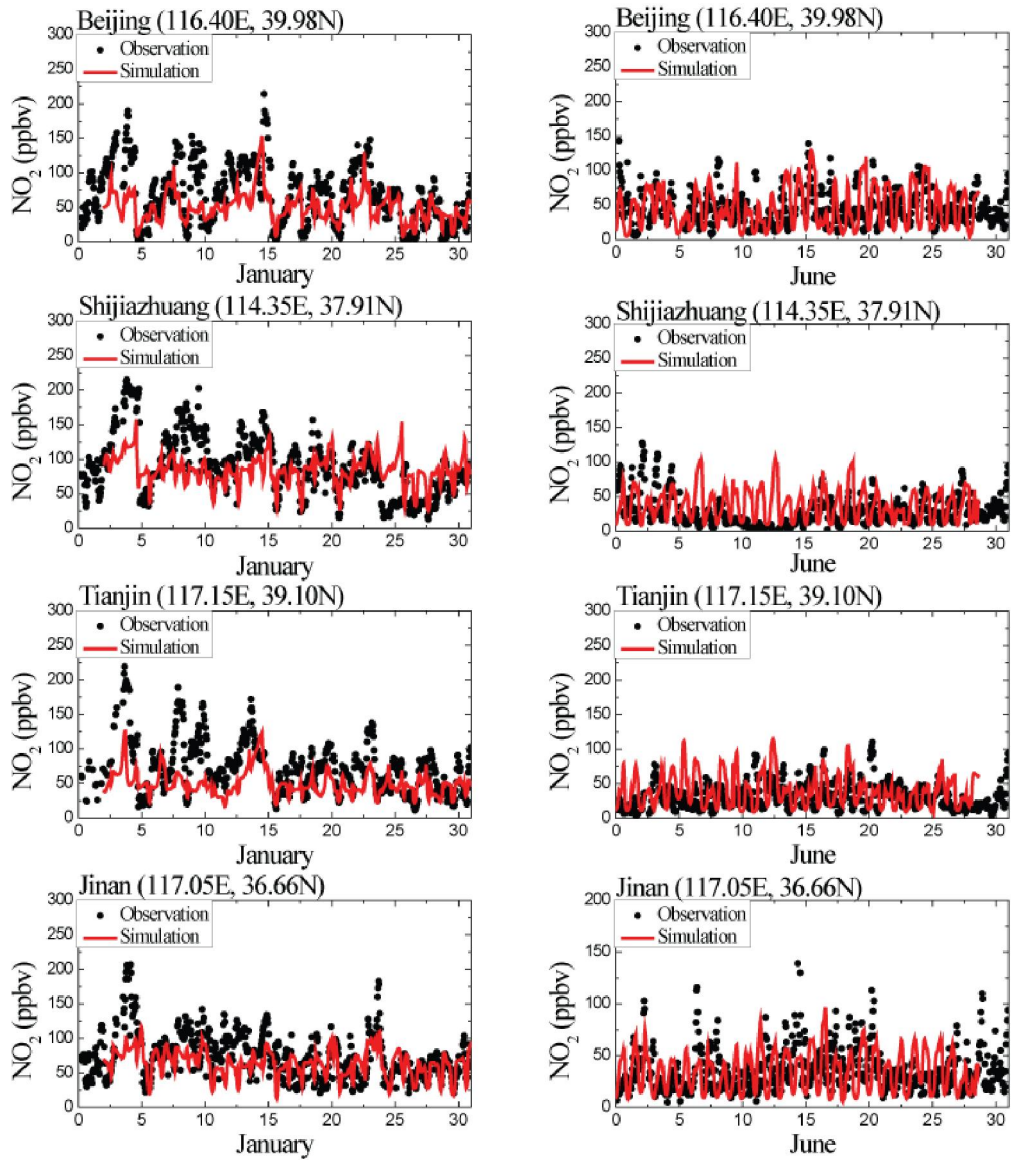

637  
 638 Figure 3. Observed (black circles) and modeled (red solid lines) hourly mass concentrations ( $\mu\text{g m}^{-3}$ ) of NO<sub>2</sub> at Beijing,  
 639 Shijiazhuang, Tianjin, and Jinan in January and June 2015.  
 640  
 641  
 642  
 643  
 644  
 645  
 646  
 647  
 648  
 649  
 650  
 651

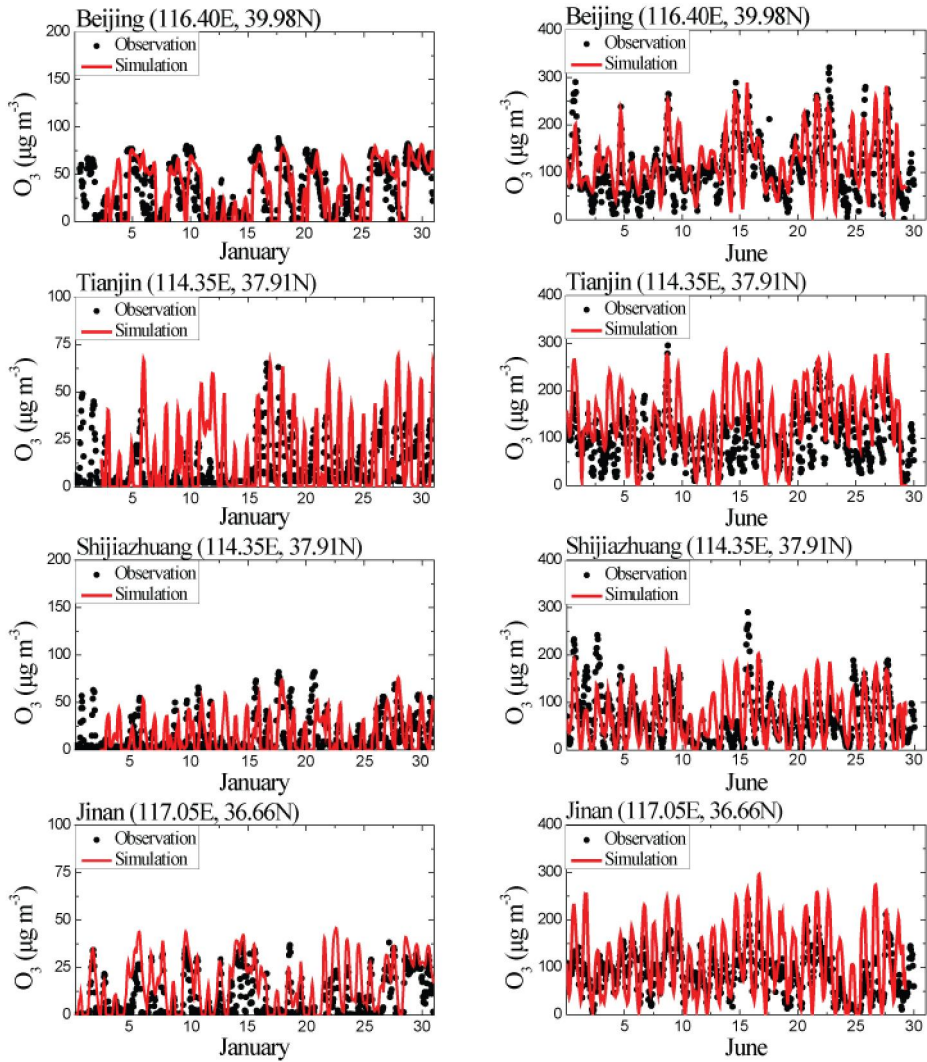

Figure 4. Observed (black circles) and modeled (red solid lines) hourly mass concentrations ( $\mu\text{g m}^{-3}$ ) of  $\text{O}_3$  at Beijing, Shijiazhuang, Tianjin, and Jinan in January and June 2015.

652  
653  
654  
655  
656  
657  
658  
659  
660  
661  
662  
663  
664  
665  
666  
667  
668



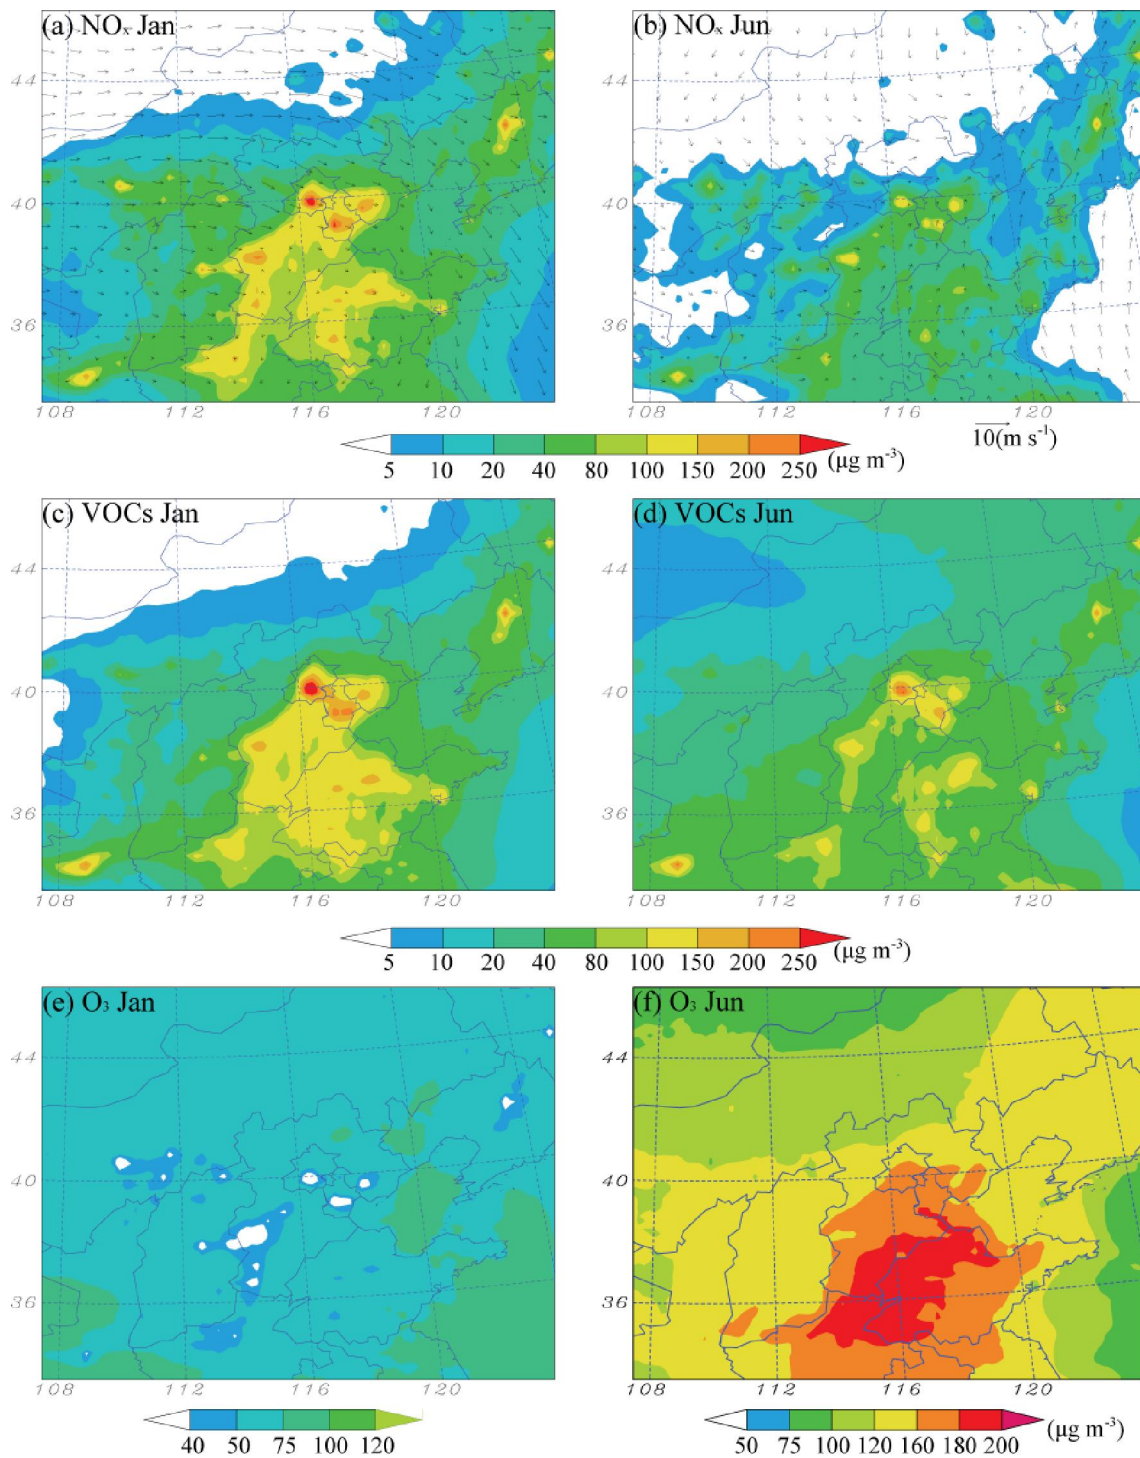

669  
 670 Figure 5. The surface spatial distributions of monthly average  $\text{NO}_x$  (a-b) and VOCs (c-d), and maximum daily 8H- $\text{O}_3$  (e-  
 671 f) in January and June 2015.  
 672  
 673  
 674  
 675  
 676  
 677  
 678

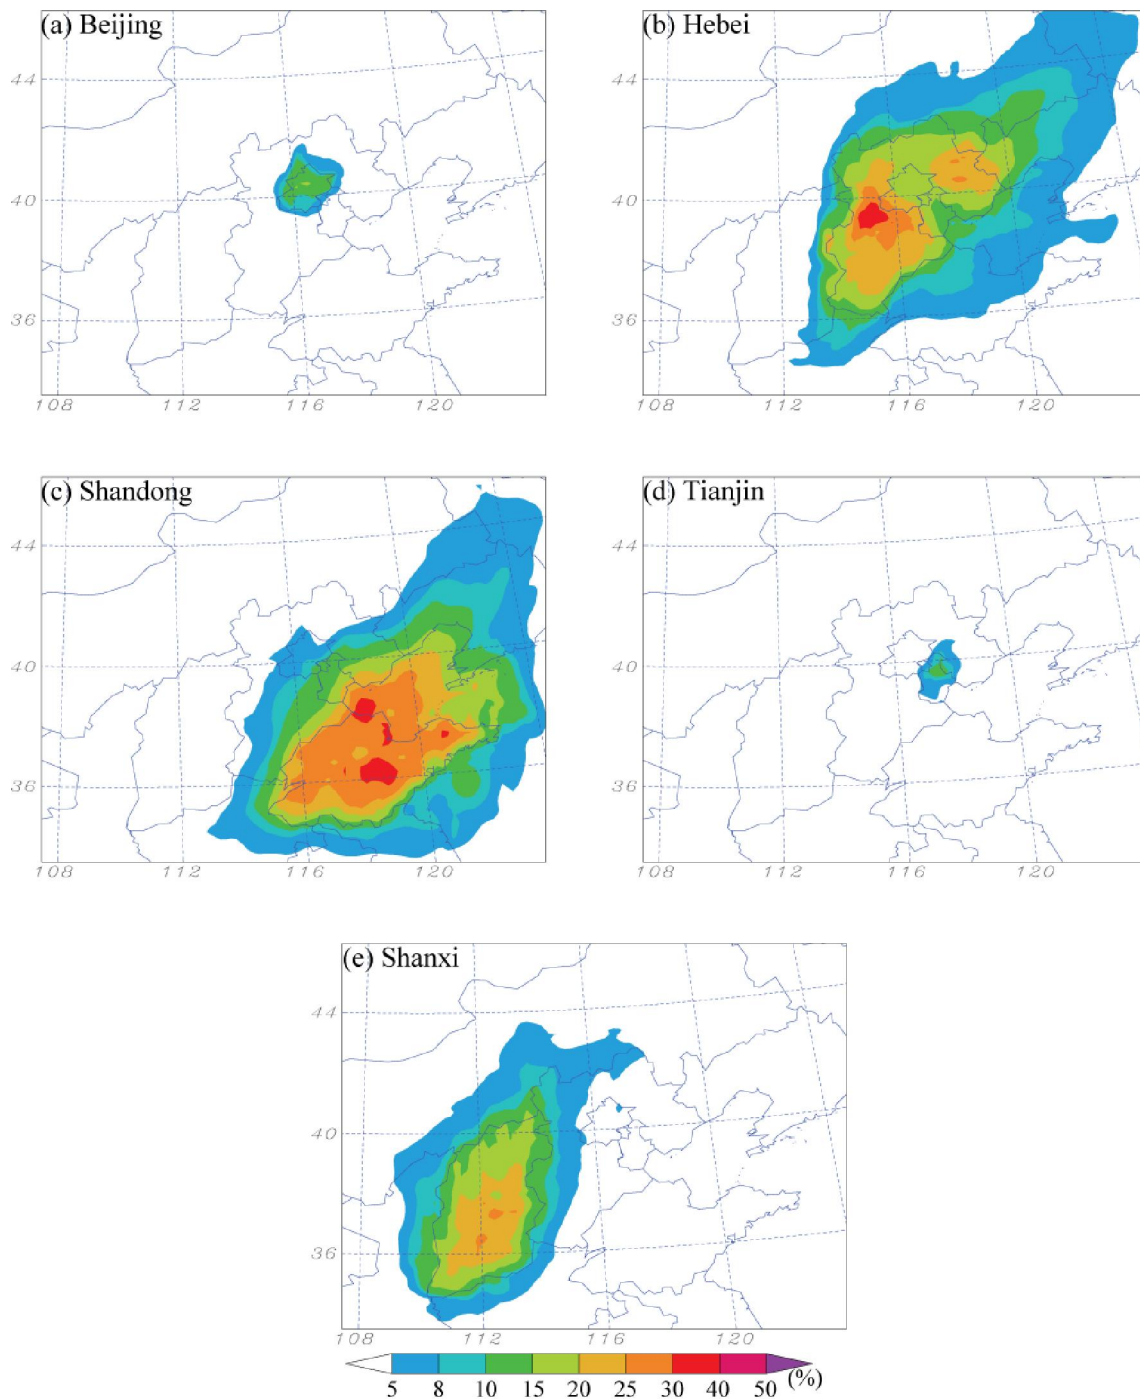

679 Figure 6. The regional contribution of  $\text{NO}_x$ -sensitive  $\text{O}_3$  from (a) Beijing, (b) Hebei, (c) Shandong, (d) Tianjin, and (e)  
 680  
 681 Shanxi in June 2015.

679  
 680  
 681  
 682  
 683  
 684  
 685  
 686  
 687  
 688  
 689



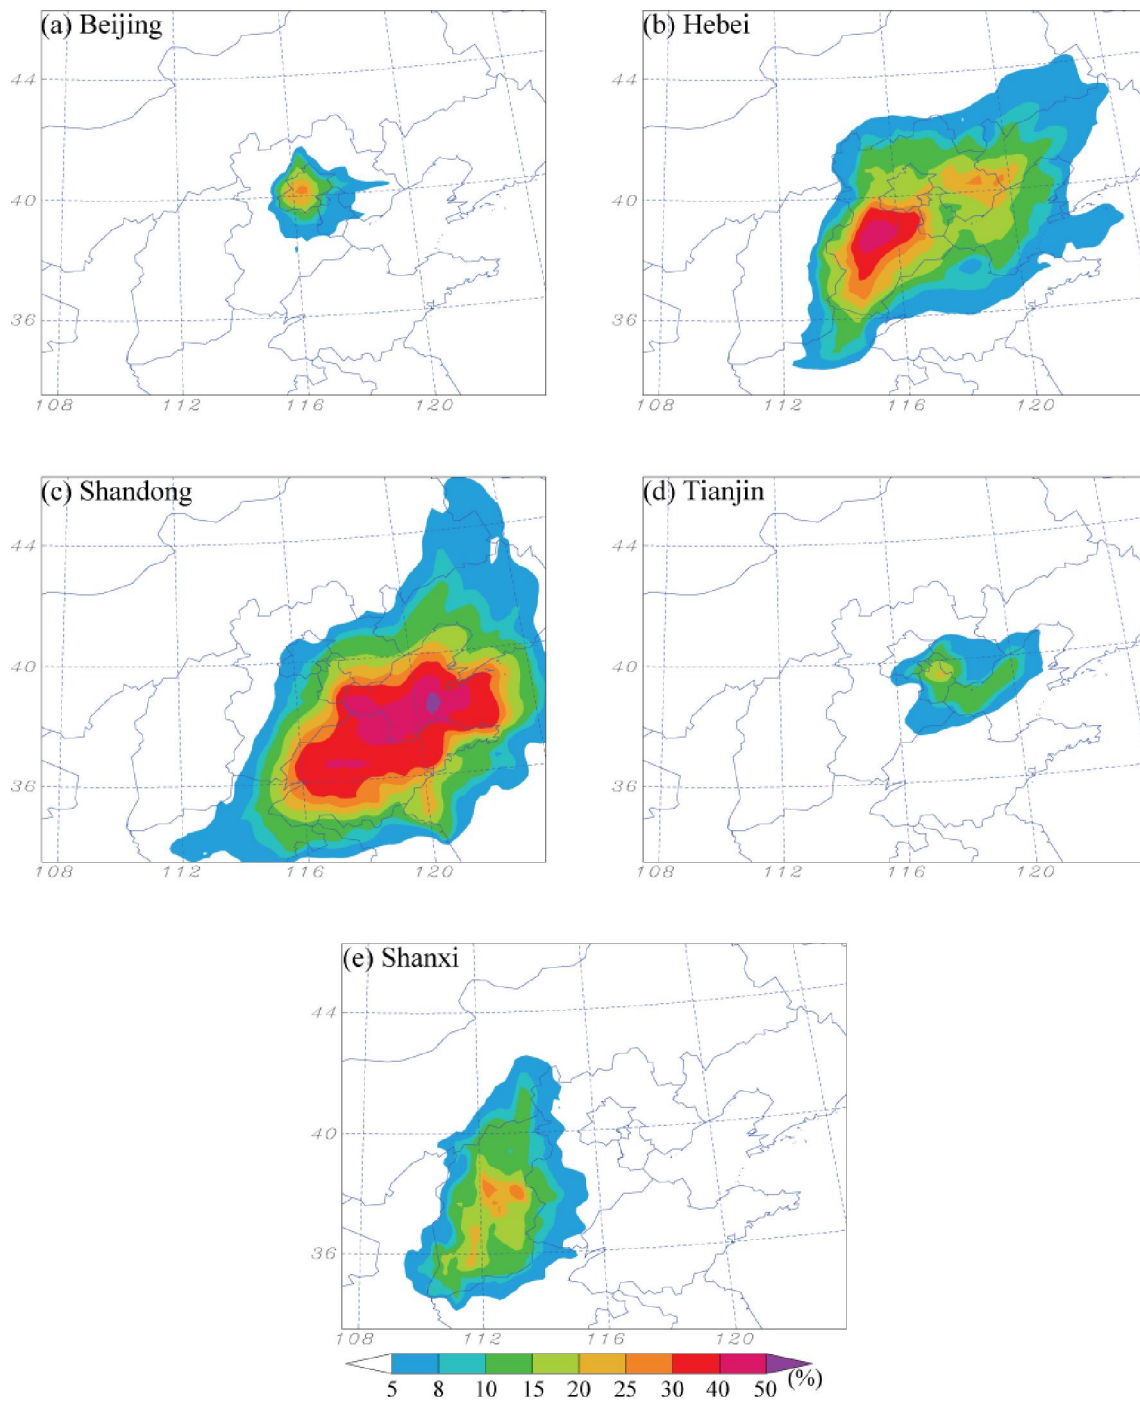

Figure 7. Same as Figure 5 but for VOC-sensitive  $O_3$ .

690  
 691  
 692  
 693  
 694  
 695  
 696  
 697  
 698  
 699  
 700

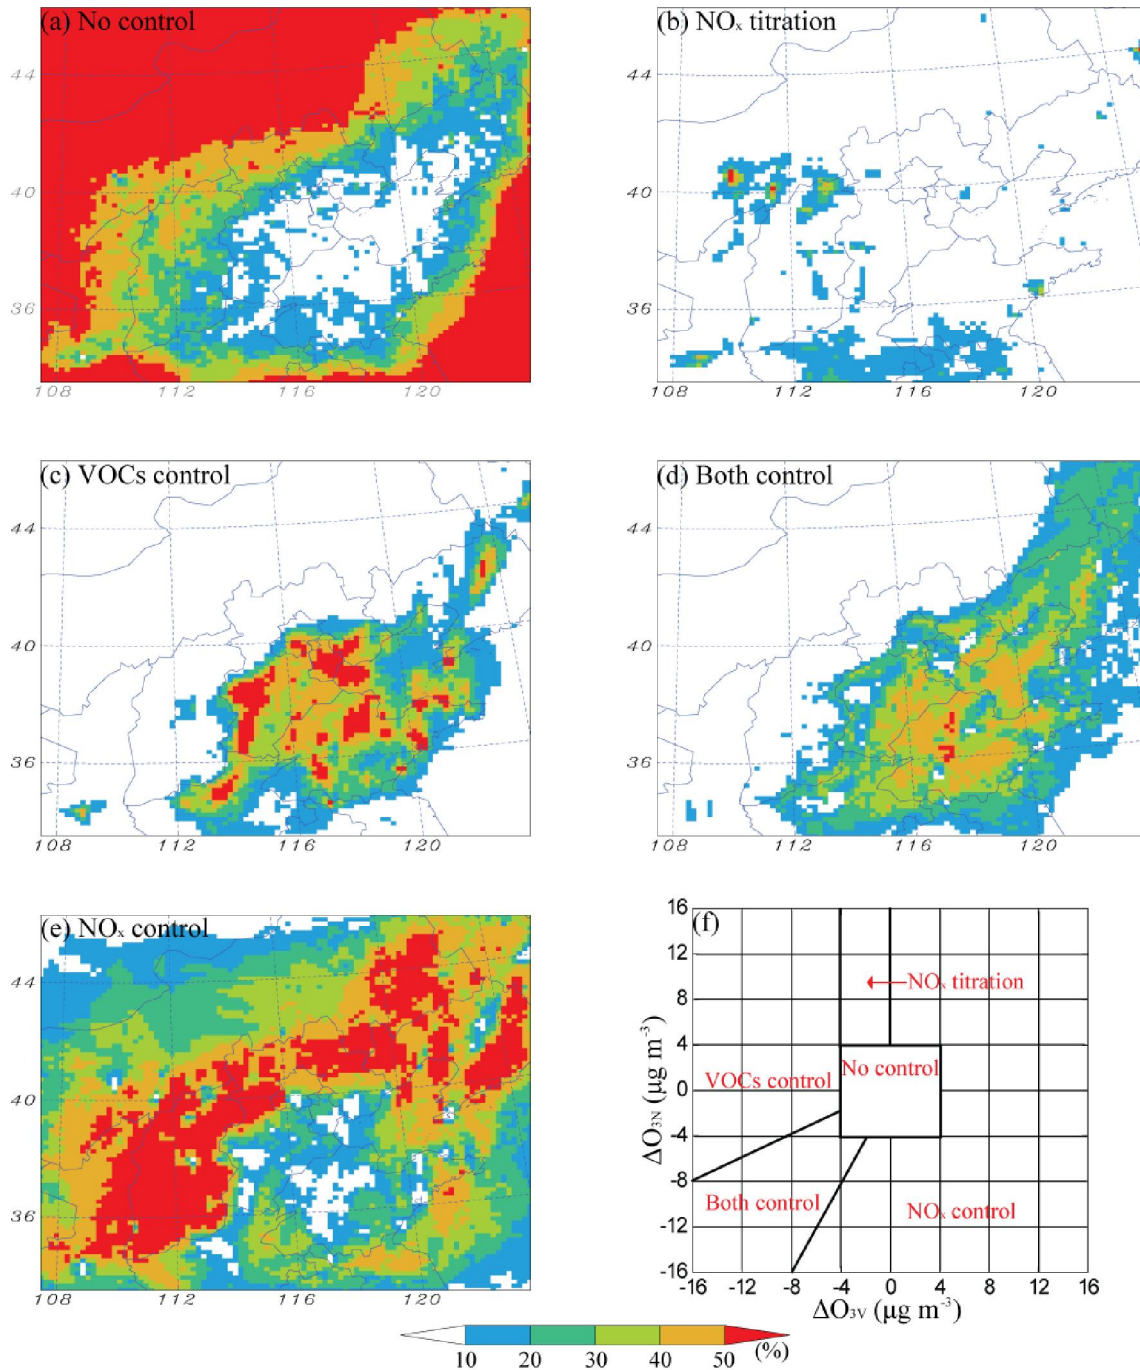

Figure 8. Distributions of the frequency of 8-hour ozone precursor sensitivity regions in June 2015.

701  
702  
703  
704  
705  
706  
707  
708  
709  
710  
711  
712

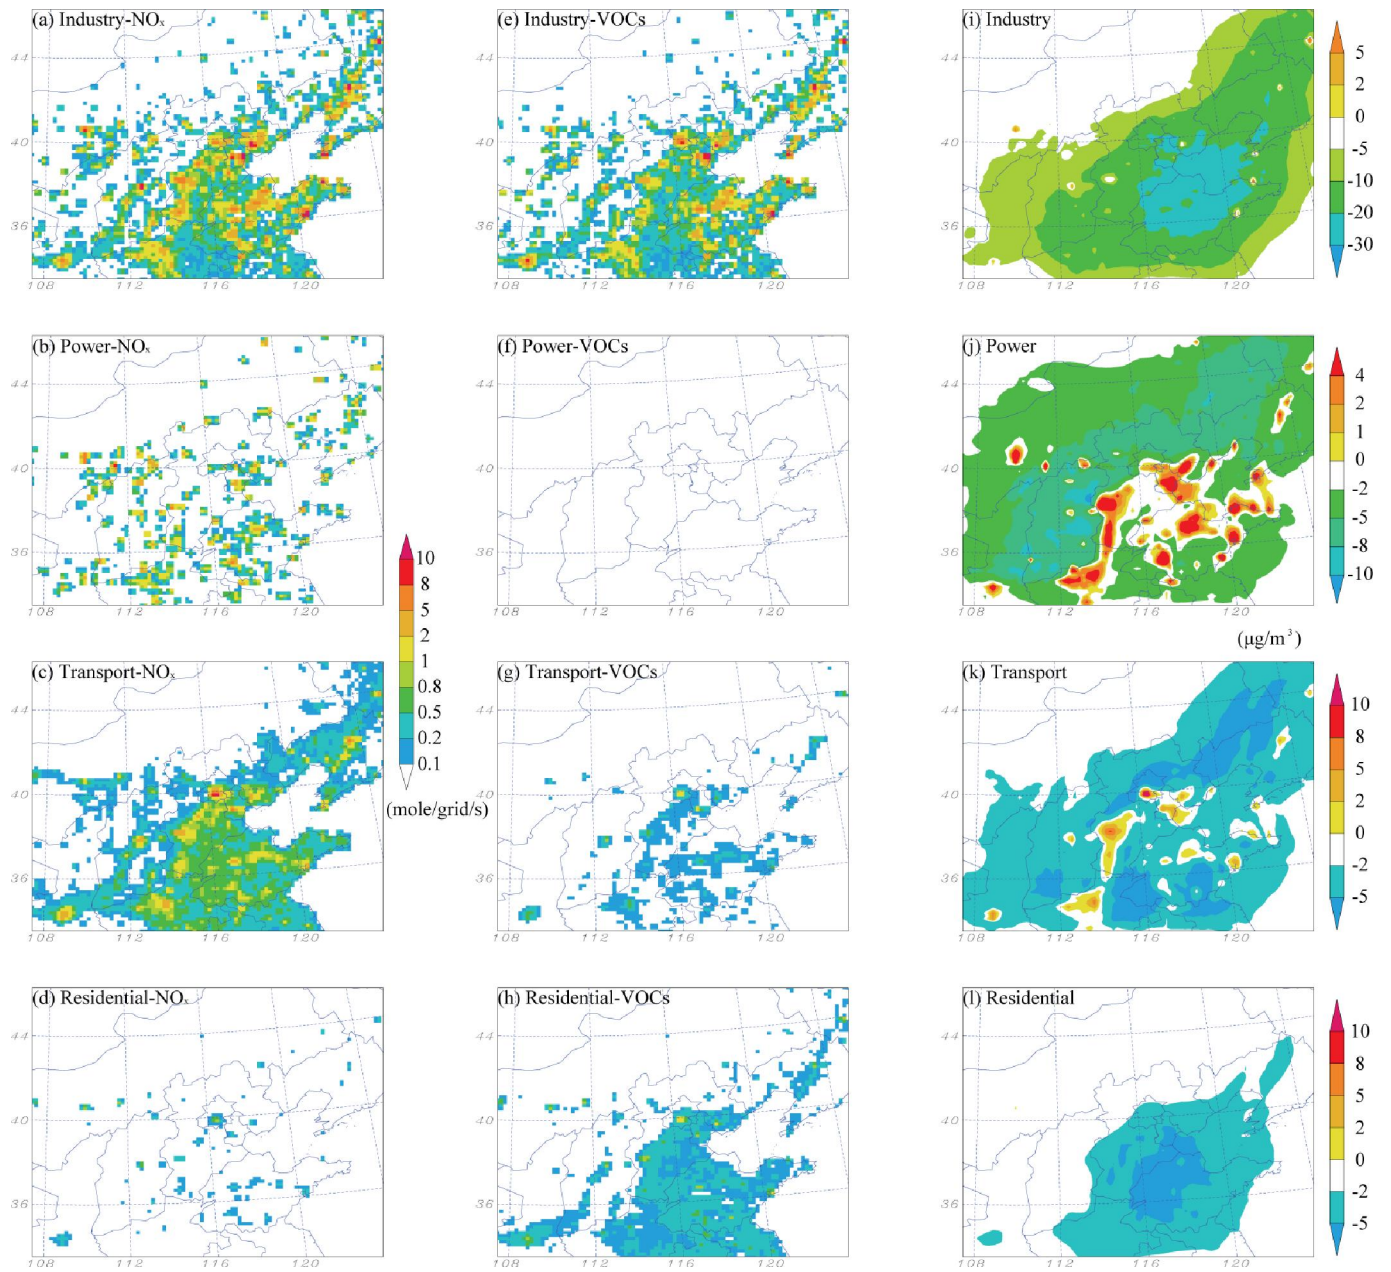

Figure 9. Distributions of the emission flux of  $\text{NO}_x$  and VOCs and the variation of mass concentration of  $8\text{H-O}_3$  associated with the ZI, ZP, ZT, and ZR in June.

713  
714  
715  
716  
717  
718  
719  
720  
721  
722  
723  
724  
725  
726



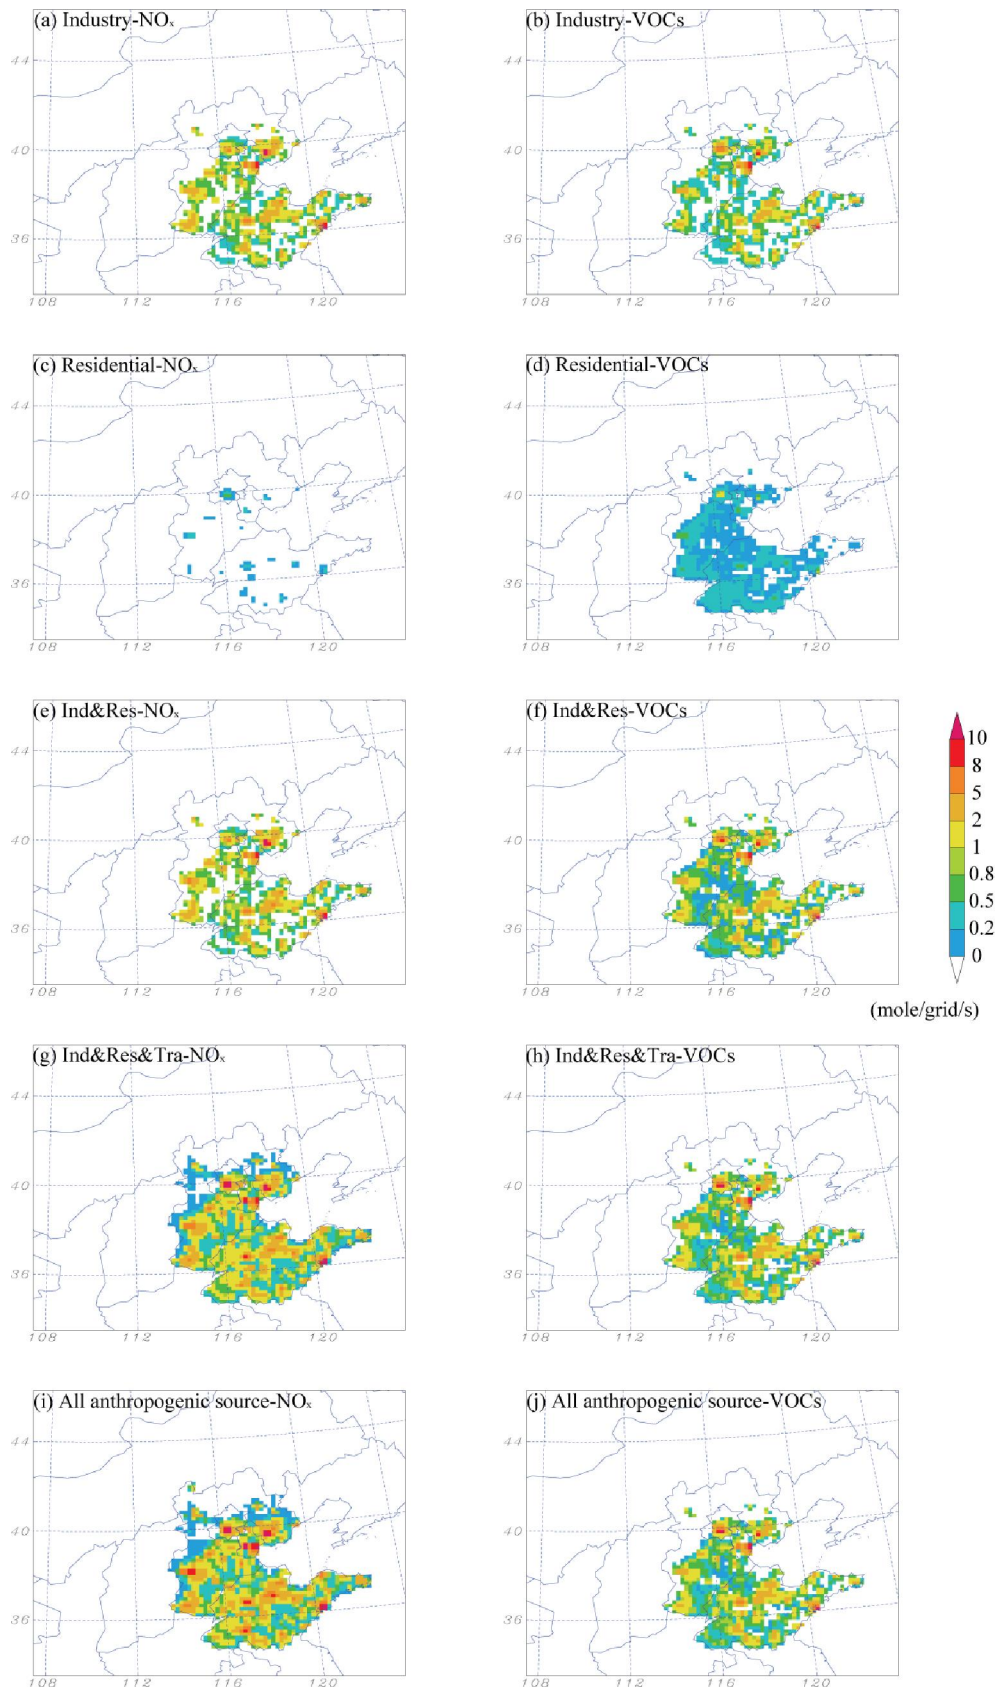

727

728

729

730

Figure 10. Distributions of the NO<sub>x</sub> and VOCs emission flux from different sectors or combinations in the high emission regions of Beijing, Tianjin, Hebei, Shandong in June.

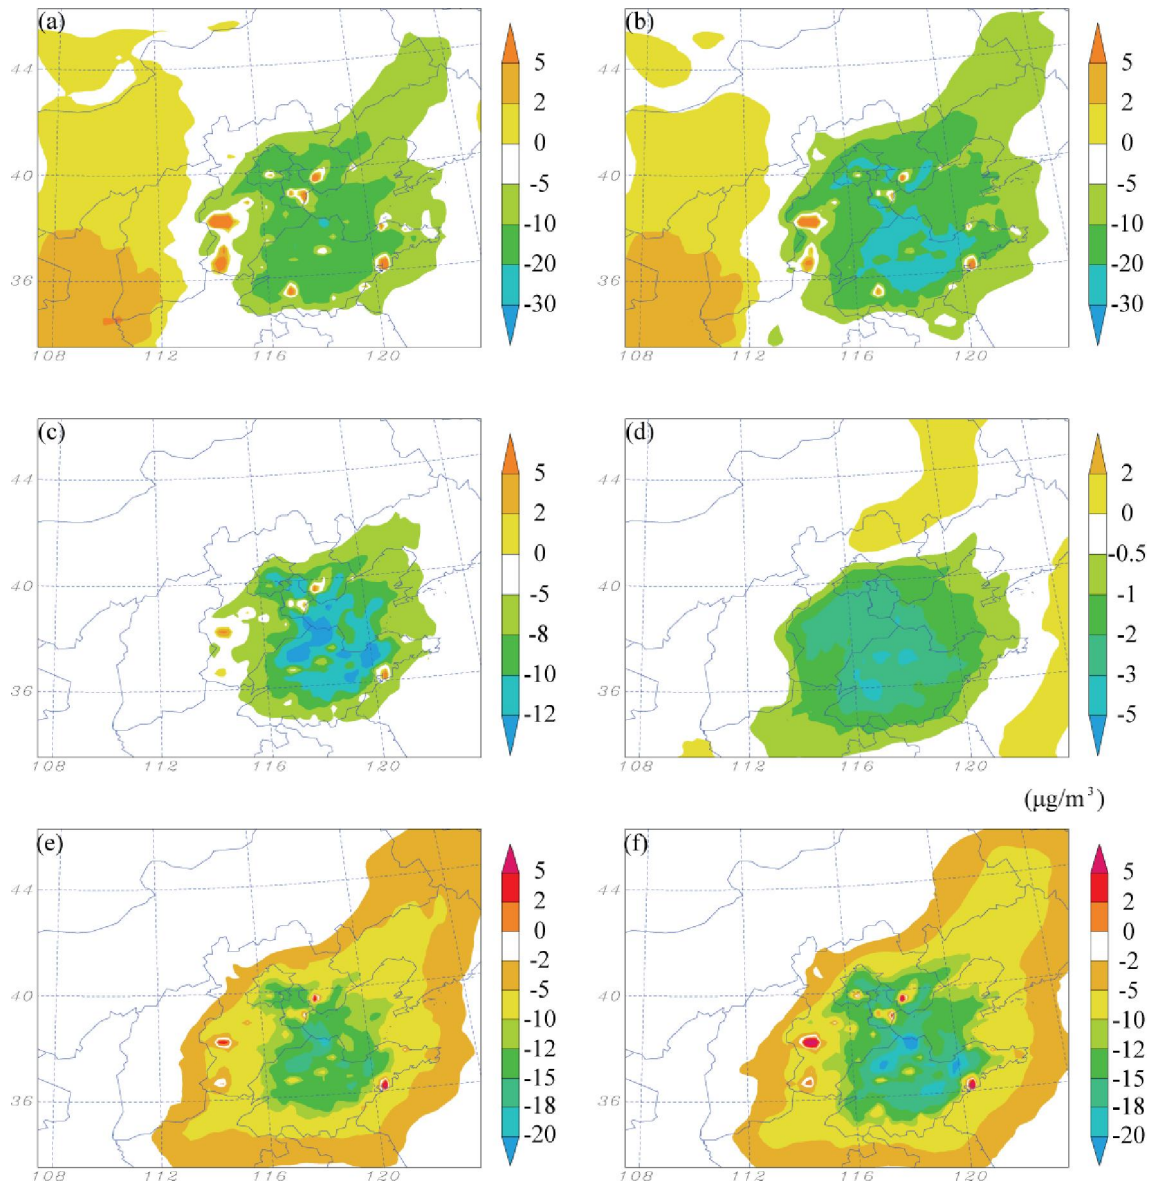

Figure 11. Distributions of the variation of 8H-O<sub>3</sub> mass concentration associated with brute force sensitivity tests: (a) A20%-HER; (b) A20%-BHTS; (c) I20%-HER; (d) R20%-HER; (e) IR20%-HER; (f) ITR20%-HER.

731  
732  
733  
734  
735  
736  
737  
738  
739  
740  
741  
742  
743  
744  
745  
746

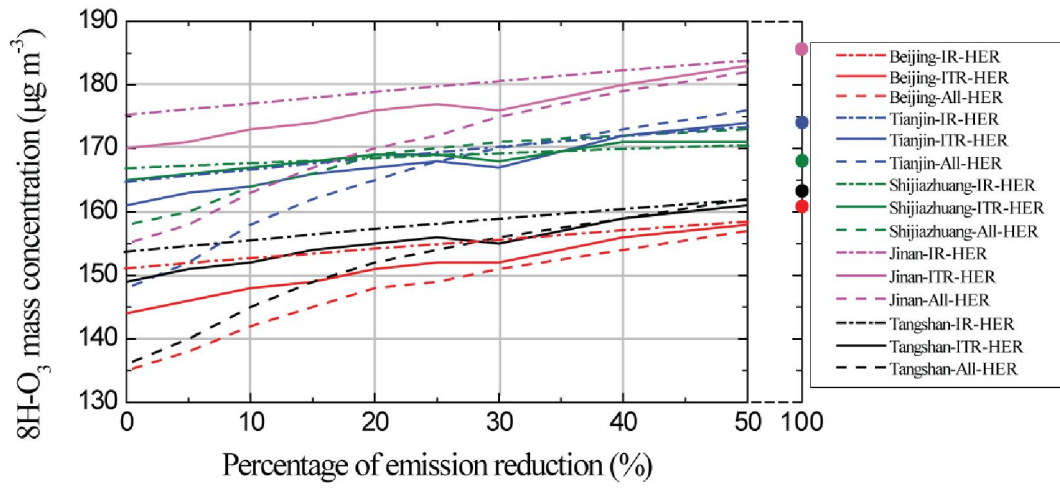

747  
 748 Figure 12. The variation of regional average 8H-O<sub>3</sub> mass concentrations in Beijing, Tianjin, Shijiazhuang, Jinan, and  
 749 Tangshan with reduction of IR, ITR and All emissions, respectively.  
 750  
 751  
 752  
 753  
 754  
 755  
 756  
 757  
 758  
 759  
 760  
 761  
 762  
 763  
 764  
 765  
 766  
 767  
 768  
 769  
 770  
 771  
 772  
 773  
 774  
 775  
 776  
 777  
 778  
 779

780

Table 1. Statistical summary of the comparisons of the hourly NO<sub>2</sub> comparison between simulation and observation

|                 |              | $N^a$ | $C_{obs}^b$ | $C_{mod}^c$ | $\sigma_{obs}^d$ | $\sigma_{mod}^e$ | $R^f$ |      |
|-----------------|--------------|-------|-------------|-------------|------------------|------------------|-------|------|
| NO <sub>2</sub> | Beijing      | Jan   | 602         | 68.71       | 50.62            | 42.98            | 21.7  | 0.59 |
|                 |              | Jun   | 588         | 45.39       | 46.75            | 24.95            | 28.49 | 0.53 |
|                 | Jinan        | Jan   | 616         | 74.39       | 63.26            | 33.98            | 19.55 | 0.55 |
|                 |              | Jun   | 639         | 34.27       | 34.93            | 19.57            | 18.76 | 0.47 |
|                 | Shijiazhuang | Jan   | 618         | 90.04       | 83.78            | 44.91            | 21.55 | 0.54 |
|                 |              | Jun   | 629         | 26.11       | 38.82            | 21.59            | 22.26 | 0.44 |
|                 | Tianjin      | Jan   | 584         | 73.73       | 49.07            | 37.94            | 18.52 | 0.55 |
|                 |              | Jun   | 639         | 30.02       | 40.29            | 18.36            | 23.25 | 0.52 |

781

<sup>a</sup> Number of samples

782

<sup>b</sup> Total mean of observation

783

<sup>c</sup> Total mean of simulation

784

<sup>d</sup> Standard deviation of observation

785

<sup>e</sup> Standard deviation of simulation

786

<sup>f</sup> Correlation coefficient between daily observation and simulation

787

788

789

790

791

792

793

794

795

796

797

798

799

800

801

802

803

804

805

806

807

808

809

810

811

812

813

814

815

Table 2. Statistical summary of the comparisons of the hourly O<sub>3</sub> comparison between simulation and observation

|                |              | <i>N</i> | <i>C<sub>obs</sub></i> | <i>C<sub>mod</sub></i> | <i>σ<sub>obs</sub></i> | <i>σ<sub>mod</sub></i> | <i>R</i> |      |
|----------------|--------------|----------|------------------------|------------------------|------------------------|------------------------|----------|------|
| O <sub>3</sub> | Beijing      | Jan      | 615                    | 33.57                  | 37.88                  | 27.58                  | 27.2     | 0.54 |
|                |              | Jun      | 676                    | 106.96                 | 120.85                 | 63.75                  | 57.33    | 0.74 |
|                | Jinan        | Jan      | 673                    | 11.09                  | 13.58                  | 10.75                  | 13.08    | 0.74 |
|                |              | Jun      | 693                    | 87.91                  | 111.44                 | 45.54                  | 71.8     | 0.62 |
|                | Shijiazhuang | Jan      | 627                    | 15.24                  | 18.54                  | 18.74                  | 18.7     | 0.57 |
|                |              | Jun      | 692                    | 69.53                  | 71.78                  | 53.15                  | 76.14    | 0.65 |
|                | Tianjin      | Jan      | 629                    | 10.83                  | 17.05                  | 11.78                  | 19.36    | 0.48 |
|                |              | Jun      | 675                    | 100.42                 | 143.31                 | 52.22                  | 69.48    | 0.74 |

816

817

818

819

820

821

822

823

824

825

826

827

828

829

830

831

832

833

834

835

836

837

838

839

840

841

842

843

844

845

846

847

848

849



850  
851  
  
852  
853  
854  
855  
856  
857  
858  
859  
860  
861  
862  
863  
864  
865  
866  
867  
868  
869  
870  
871  
872  
873  
874  
875  
876  
877  
878  
879  
880  
881  
882  
883  
884  
885  
886  
887

Table 3. The regional transport contributions of O<sub>3</sub> mass concentration in Beijing, Tianjin, Hebei, Shandong, Shanxi, and boundary condition (BCON), initial condition (ICON), and other sources (nature sources)

|          | Beijing | Tianjin | Hebei | Shandong | Shanxi | BCON  | ICON | Other |
|----------|---------|---------|-------|----------|--------|-------|------|-------|
| Beijing  | 23.1%   | 5.3%    | 35.2% | 13.2%    | 5.4%   | 7.3%  | 0.1% | 10.4% |
| Tianjin  | 9.0%    | 14.9%   | 29.0% | 37.3%    | 3.6%   | 1.8%  | 0.1% | 4.3%  |
| Hebei    | 6.3%    | 5.3%    | 36.6% | 19.4%    | 7.7%   | 16.4% | 0.1% | 8.2%  |
| Shandong | 1.3%    | 2.1%    | 9.6%  | 53.6%    | 3.1%   | 19.4% | 0.1% | 10.8% |
| Shanxi   | 1.4%    | 1.4%    | 10.8% | 4.5%     | 45.0%  | 22.1% | 0.1% | 14.7% |

Table 4. The brute force sensitivity tests set in this study

|    | Abbreviation | Brute force sensitivity test                                                                              |
|----|--------------|-----------------------------------------------------------------------------------------------------------|
| 1  | ZI           | Zero-out of industry emission sector                                                                      |
| 2  | ZP           | Zero-out of power plants emission sector                                                                  |
| 3  | ZT           | Zero-out of transport emission sector                                                                     |
| 4  | ZR           | Zero-out of residential emission sector                                                                   |
| 5  | A20%-BHTS    | 20% emission of all anthropogenic sectors in BHTS                                                         |
| 6  | A20%-HER     | 20% emission of all anthropogenic sectors in the selected high emission regions of BHTS                   |
| 7  | I20%-HER     | 20% emission of industry sector in the selected high emission regions of BHTS                             |
| 8  | R20%-HER     | 20% emission of residential sector in the selected high emission regions of BHTS                          |
| 9  | IR20%-HER    | 20% emission of industry and residential sector in the selected high emission regions of BHTS             |
| 10 | ITR20%-HER   | 20% emission of industry, transport, and residential sector in the selected high emission regions of BHTS |

889  
890  
891  
892  
893  
894  
895  
896  
897  
898  
899  
900  
901  
902  
903  
904  
905  
906  
907  
908  
909  
910  
911  
912  
913  
914  
915

916  
917  
918  
919  
920  
921  
922  
923  
924  
925  
926  
927  
928
